1                   **Rethinking symbiotic metabolism: trophic strategies in the microbiomes of**  
2                                           **different sponge species**

3

4 Burgsdorf I<sup>1</sup>, Sizikov S<sup>1</sup>, Squatrito V<sup>1</sup>, Britstein M<sup>1</sup>, Slaby BM<sup>2</sup>, Cerrano C<sup>3</sup>, Handley KM<sup>4</sup>,  
5 Steindler L<sup>1\*</sup>

6

7 <sup>1</sup>Department of Marine Biology, Leon H. Charney School of Marine Sciences, University of  
8 Haifa, Israel.

9 <sup>2</sup>GEOMAR Helmholtz Centre for Ocean Research Kiel, RD3 Marine Ecology, RU Marine  
10 Symbioses, Kiel, Germany.

11 <sup>3</sup>Department of Life and Environmental Sciences, Polytechnic University of Marche,  
12 Ancona, Italy.

13 <sup>4</sup>School of Biological Sciences, The University of Auckland, Auckland, New Zealand.

14

15 **\*Corresponding author:** Laura Steindler

16 Department of Marine Biology, Leon H. Charney School of Marine Sciences

17 University of Haifa, 199 Aba Khoushy Ave

18 Mount Carmel, Haifa, 3498838, Israel

19 Phone: +972-4-8288987 / Fax: +972-4-8288267 / Email: [lsteindler@univ.haifa.ac.il](mailto:lsteindler@univ.haifa.ac.il)

20 **Running title:** Energy and carbon metabolism in sponge microbiomes

21

22

23 **Abstract**

24           In this study we describe the major lithoheterotrophic and autotrophic processes in 21  
25 microbial sponge-associated phyla using novel and existing genomic and transcriptomic  
26 datasets. We show that a single gene family, molybdenum-binding subunit of dehydrogenase  
27 (*coxL*), likely evolved to benefit both lithoheterotrophic and organoheterotrophic symbionts,  
28 through adaptation to different inorganic and organic substrates. We show the main microbial  
29 carbon fixation pathways in sponges are restricted to specialized symbiotic lineages within  
30 five phyla. We also propose that sponge symbionts, in particular Acidobacteria, are capable  
31 of assimilating carbon through anaplerotic processes. However, the presence of symbionts  
32 genomically capable of autotrophy does not inform on their actual contribution to light and  
33 dark carbon fixation. Using radioisotope assays we identified variability in the relative  
34 contributions of chemosynthesis to total carbon fixation in different sponge species.  
35 Furthermore, the symbiosis of sponges with two closely related Cyanobacteria results in  
36 outcomes that are not predictable by analysis of *-omics* data alone: *Candidatus*  
37 *Synechococcus spongiarum* contributes to the holobiont carbon budget by transfer of  
38 photosynthates, while *Candidatus Synechococcus feldmannii* does not. Our results highlight  
39 the importance of combining sequencing data with physiology to gain a broader  
40 understanding of carbon metabolism within holobionts characterized by highly diverse  
41 microbiomes.

42

43

44

45

## 46 **Introduction**

47           Microbes can autotrophically assimilate inorganic carbon (Ci) via seven pathways  
48 including the Calvin-Benson-Bassham (CBB) cycle, the reductive tricarboxylic acid  
49 (rTCA) cycle, the Wood-Ljungdahl pathway (WL), and the 3-hydroxypropionate/4-  
50 hydroxybutyrate (3-HP/4-HB) cycle [1]. Additionally, various solo-acting enzymes can be  
51 involved in Ci assimilation without being part of *sensu stricto* carbon fixation. For instance,  
52 Ci assimilation in anaplerotic reactions was proposed to be abundant among marine  
53 planktonic heterotrophs [2–4]. Anaplerotic reactions undertaken by pyruvate (PYC) and  
54 phosphoenolpyruvate (PPC) carboxylases often occur at low levels to replace intermediates  
55 of the tricarboxylic acid (TCA) cycle. However, enhanced anaplerotic Ci assimilation was  
56 reported in marine planktonic lithoheterotrophs that combine organotrophy with the  
57 additional use of inorganic electron donors [4]. Malic enzyme (MEZ) was also shown to  
58 operate in the carboxylating (anaplerotic) direction, playing an essential role in the  
59 intracellular survival of the pathogen *Mycobacterium tuberculosis* [5, 6], in planktonic stages  
60 of *Pseudomonas aeruginosa* PAO1 [7] and in deep-sea Alphaproteobacteria [8].

61           Sponges (phylum Porifera) are ancient cosmopolitan filter-feeders [9, 10]. They  
62 play an important role in nutrient recycling by transforming Dissolved Organic Matter  
63 (DOM) into detrital Particulate Organic Matter, thereby making it available for other  
64 invertebrates in nutrient poor environments [11, 12]. Sponge-associated microbial  
65 communities include more than 60 bacterial and archaeal phyla [13], which are specific to  
66 their hosts [14–17]. These sponge-associated symbionts can be categorized based on their  
67 nutrition strategies, for instance (photo- and chemo-) autotrophic, organoheterotrophic and  
68 lithoheterotrophic. Heterotrophic symbionts can contribute up to 87% of the total sponge  
69 holobiont DOM assimilation [18], while autotrophic photosymbionts can contribute to host  
70 growth when exposed to light [19]. Beyond photosymbionts, various bacterial and archaeal

71 phyla in sponges harbor mechanisms associated with autotrophic metabolism, *e.g.*, the 3-  
72 HP/4-HB pathway in Thaumarchaeota, and the rTCA in Nitrospirota, Alphaproteobacteria  
73 and Oligoflexia [20–25]. However, carbon assimilation capacities within the sponge  
74 microbiome remain under-described, and the contribution of chemoautotrophy to the pool of  
75 microbially-fixed carbon in sponges has not yet been tested.

76 Net primary productivity and stable isotope analyses of the microbial and host sponge  
77 fractions showed that different species of symbiotic filamentous and unicellular  
78 Cyanobacteria differ in their ability to assimilate and transfer carbon to the host [26]. The  
79 unicellular *Parasynechococcus*-like cyanobacterial species are the most commonly reported  
80 in sponges [27, 28]. These include *Candidatus* *Synechococcus* *spongiarum*, enriched in 28  
81 sponge species around the globe (including *Theonella swinhoei* from this study) [29], and  
82 *Candidatus* *Synechococcus* *feldmannii*, the symbiont of *Petrosia ficiformis* [30, 31]. The  
83 latter symbiosis is facultative, with *P. ficiformis* growing in light environments with *Ca. S.*  
84 *feldmannii*, and in dark-(cave)-environments without it. The heterotrophic microbial  
85 community of *P. ficiformis* is functionally and compositionally independent from the  
86 presence of *Ca. S. feldmannii*, being nearly identical in both structure and gene expression  
87 in specimens with and without this photosymbiont [31, 32]. This suggests that  
88 photosynthetically derived carbon may not be the main carbon source for heterotrophic *P.*  
89 *ficiformis*-associated symbionts. In this study we tested whether microbially fixed carbon  
90 or rather accumulation of DOM by the host represent the main supply of organic carbon to  
91 *P. ficiformis*.

92 Oxidation of diverse inorganic compounds, such as ammonia, nitrite, sulfide and  
93 thiosulfate, can serve as energy source for both autotrophic and lithoheterotrophic  
94 microorganisms, and these can also be found within the sponge microbiome [33–36]. Here,  
95 we characterized the dominant carbon fixation processes, and identified the energetic sources



96 used by lithoheterotrophs across different microbial species within sponge symbiotic  
97 communities. This was achieved through a genomic analysis of 402 symbiotic metagenome-  
98 assembled genomes (MAGs) from 10 different sponge species, and 39 metatranscriptomes  
99 from the sponge *P. ficiformis*. Further, using radioisotopes, we investigated the contribution  
100 of light and dark microbial carbon fixation in two sponge systems (*P. ficiformis* and *T.*  
101 *swinhoei*).

102

## 103 **Materials and methods**

### 104 ***Sponge sampling and microbial DNA purification***

105 Three *P. ficiformis* specimens, 277c, 287ce, and 288c (c, cortex; e, endosome), were  
106 collected by SCUBA diving on January 6<sup>th</sup>, 2014, at depths 27, 23 and 15 meters,  
107 respectively, at Achziv nature marine reserve, Mediterranean Sea, Israel. Sponge samples  
108 were collected in compliance with permits from the Israel Nature and National Park  
109 Protection Authority. Microbial DNA was obtained as previously described [37].  
110 Information about collection of additional nine sponge species can be found in Table S1.

### 111 ***Shotgun sequencing, assembly and binning***

112 Preparation of metagenomic shotgun sequencing KAPA Hyper DNA libraries,  
113 sequencing, read trimming and *de novo* assemblies for the three *P. ficiformis* specimens were  
114 performed as previously described [37]. 50 genomes were binned using manual methods  
115 including visualization of differential coverage information derived from three *P. ficiformis*  
116 specimens (see File S1 at <https://figshare.com/s/e305160ebd82d21bf151>). DNA extraction,  
117 and assembly of MAGs from *T. swinhoei* (SP3), *Ircinia variabilis* (142) and *Aplysina*  
118 *aerophoba* (15L) are described in [38] and [21], respectively. Taxonomic affiliation of  
119 assembled scaffolds, binning of final MAGs, and relative abundance calculations are  
120 described in File S2.

## 121 ***MAG annotation and completeness estimation***

122 Open Reading Frames were identified using Prodigal v2.6.3 with the metagenome  
123 options [39]. Protein sequences were queried against the Clusters of Orthologous Groups  
124 (COGs) database (version 2014) as previously described (see File S3 at  
125 <https://figshare.com/s/786acca3672a820da570>) [37]. The amino acid sequences were also  
126 searched against the KEGG orthology (KO) database using standalone KofamKOALA 1.3.0  
127 (see File S4 at <https://figshare.com/s/a0ff9b495588b99e7c75>) [40]. Selected enzymes were  
128 annotated using previously published Hidden Markov models (HMM) [41] with individual  
129 score thresholds (Table S2) using hmmsearch [42]. Phylogenomic tree construction and  
130 taxonomic annotation was done using PhyloPhlAn2 [43]  
131 (<https://bitbucket.org/nsegata/phylophlan/wiki/phylophlan2>), RAxML [44] as previously  
132 described [45] and GTDB-Tk v1.3 with release r95 [46]. Trees were visualized using iTol  
133 [47]. Completeness and contamination rates of all final MAGs were estimated with checkM  
134 version 1.0.7 [48] using lineage\_wf.

## 135 ***Annotation of transcriptomic data***

136 Metatranscriptomes were previously obtained from 39 *P. ficiformis* specimens  
137 sampled in Ligurian Sea, Italy (as described in [31]), and quantified by Salmon software [49].  
138 Translated sequences of the assembled and filtered bacterial metatranscriptomes were  
139 assigned to the proteins of MAGs assembled from Israeli *P. ficiformis* specimen 277c using  
140 blastp 2.2.30+ ( $E$ -value threshold =  $1E-10$ , identity = 55%). Taxonomic annotation of  
141 transcripts was determined based on the best hits (highest bit score and lowest  $E$ -value).  
142 Transcripts with the same function and MAG affiliation were merged prior to analyses.  
143 Expression of certain functions in a specific organism (MAG) was additionally confirmed  
144 using mapping of the genes against metatranscriptome reads with bbmap tool v 37.62 [50]  
145 (minimal identity=0.70, kmer size=13) from the BBtools package (<https://jgi.doe.gov/data->

146 [and-tools/bbtools/](#)), ( $\geq 5$  reads as a threshold). Functional annotation of the  
147 metatranscriptomes of *P. ficiformis* against the COG database was done as described  
148 previously [37] and search against the KEGG database was done via the GhostKOALA  
149 website using the genus\_prokaryotes database (August 2020) [51]. Data was analyzed and  
150 visualized using the R packages dplyr, tidyr [http://tidyr.tidyverse.org], ggplot2 [52], plotly  
151 [53], reshape2 [54] and superheat [55]. A schematic representation of the bioinformatic  
152 analyses is available in Figure S1.

153 ***Carbon fixation measurements in Theonella swinhoei and Petrosia ficiformis with***  
154 ***H<sup>14</sup>CO<sub>3</sub><sup>-</sup>***

155 Photosynthetic (light) and chemosynthetic (dark) fixed carbon was measured in *P.*  
156 *ficiformis* (n=3) and *T. swinhoei* (n=4) specimens. For *P. ficiformis*, experiments were done  
157 on sponge cores, for *T. swinhoei*, on whole sponges and sponge cores. In *P. ficiformis* there  
158 are sponge areas facing light, that harbor Cyanobacteria (*Ca. S. feldmannii*), and others  
159 facing the shade, without Cyanobacteria. We thus used sponge cores from both areas with  
160 and without *Ca. S. feldmannii* in our experiments. Based on a pre-experiment on *T. swinhoei*  
161 cores, we determined the optimal incubation time of 2 hours (data not shown), used for all  
162 follow-up experiments. Next, we incubated cores (*P. ficiformis*) and whole sponges (*T.*  
163 *swinhoei*) in beakers with autoclaved seawater and 1  $\mu\text{l}$  of  $\text{NaH}^{14}\text{CO}_3$  (ARC, 150922,  
164 1mCi/1ml) tracer for each 10 ml medium, stirring manually every 10 min. Beakers were  
165 exposed to light (100-150 and 50  $\mu\text{mol photons m}^{-2} \text{s}^{-1}$ , for *P. ficiformis* and *T. swinhoei*,  
166 respectively) or to darkness.  $\text{NaH}^{14}\text{CO}_3$  in the medium was measured every 30 min, by  
167 sampling 0.1 ml of seawater from each beaker and transferring to a scintillation vial  
168 containing 3 ml of scintillation fluid (UltimaGold®, Perkin-Elmer for *P. ficiformis* and Opti-  
169 fluor®, high flash-point LSC cocktail, Packard Bioscience for *T. swinhoei*). At the end of the  
170 incubation, each core section was left for 3 minutes on a paper towel to lose excess water,

171 weighted and then transferred to a vial containing 0.5 ml N,N-Dimethylformamide (Sigma),  
172 to release labeled fixed carbon from the tissue to the liquid, and 45  $\mu$ l HCl 20% (Sigma), to  
173 release labeled/unlabeled non-fixed carbon. Sponge tissue was disintegrated manually with a  
174 plastic homogenizer and the vials were left uncovered for 48 hours in the chemical hood.  
175 After this time, 0.1 ml liquid was transferred to a new vial containing 3 ml scintillation fluid.  
176 All vials were measured in a liquid scintillation counter. Tri-Carb® 2810TR, Perkin Elmer  
177 and Tri-Carb® 1500, Lumitron, Packard Bioscience were used to measure the Discharges Per  
178 Min (DPM) for *P. ficiformis* and *T. swinhoei*, respectively. A detailed explanation about  
179 sponge sampling and core preparations for C fixation experiments is available in the File S2.

180

## 181 **Results and Discussion**

182 Overall, 47 bacterial and 3 archaeal MAGs belonging to 14 phyla were recovered  
183 from three *P. ficiformis* specimens, and are estimated to be 62 to 100% complete, with 0 to  
184 5.5% contamination (Table S3). These genomes represent 38-41% of the assembled data and  
185 were investigated together with 8 additionally assembled MAGs from *T. swinhoei* (SP3),  
186 *Ircinia variabilis* (142) and *A. aerophoba* (15L) (Table S3), and additional 344 MAGs from  
187 previous studies [21, 24, 61–66, 25, 29, 37, 56–60] (Table S1) to identify all the dominant  
188 autotrophic and lithoheterotrophic processes found in sponge symbionts.

### 189 ***Autotrophy in sponge symbionts***

190 We investigated the presence of known prokaryotic carbon fixation mechanisms  
191 among 402 sponge-associated MAGs derived from 10 sponge species (Figure 1, Figure S2,  
192 Tables S1, S3 and S4). The metabolic capacities of the sponge-associated symbionts are  
193 presented in Table S4 and their predicted trophic lifestyles, are summarized in Figure 2.  
194 Accordingly, we found that the autotrophic pathways 3-HP/4-HB, CBB and rTCA were

195 mainly restricted to Cyanobacteria, Tectomicrobia, Nitrospirota, and Thaumarchaeota phyla  
196 and two gammaproteobacterial orders.

197 RuBisCO-related genes were identified in all 16 cyanobacterial and 3 (out of 47)  
198 gammaproteobacterial genomes. Gammaproteobacterial MAGs from *P. ficiformis* lacked  
199 RuBisCO-related genes, or evidence of any other C-fixation pathways, and thus likely  
200 pursued a heterotrophic lifestyle. Yet, within these sponge species, 2 out of 5  
201 gammaproteobacterial MAGs exhibited genomic potential for CO oxidation via carbon  
202 monoxide dehydrogenase (CODH), which can serve as energy source [67]. In *I. ramosa*,  
203 Gammaproteobacteria clades G2 (order UBA10353 and family LS-SOB) and G3 (order and  
204 family UBA4575) had genes for thiosulfate oxidation (Table S4), which can fuel carbon  
205 fixation (Figure 1, Figure S2) through RuBisCO (also found in three MAGs within G2 and  
206 G3 clades, File S2), indicating the potential for chemoautotrophy. Gammaproteobacteria G1,  
207 G4 and G5 did not have this pathway, yet encoded for CODH (*coxSML* and *coxG*) (Figure 1,  
208 Figure S2). Taken together, data show that gammaproteobacterial symbionts include two  
209 trophic groups: chemoautotrophs and lithoheterotrophs.

210 The filamentous Entotheonellia (phylum Tectomicrobia) found in the sponge *T.*  
211 *swinhoei* [61, 68, 69], were identified as chemoautotrophs based on the presence of a large  
212 cohort of CBB related genes [61]. We did not detect RuBisCO in the Tectomicrobia genomes  
213 (Table S4), which may be due to MAG incompleteness. Energy for carbon fixation in this  
214 phylum may be provided by oxidation of multiple inorganic donors, providing metabolic  
215 versatility to shifting environmental conditions within the host [70, 71]. Inorganic donors  
216 (and mechanisms for oxidation) include CO (CODH), H<sub>2</sub> (3b group hydrogenase), thiosulfate  
217 (Sox complex), and possibly even arsenite (AoxAB) (Table S4). Presence of arsenic was  
218 reported in sponges, at highest concentrations in *T. swinhoei* [72]. Oxidation of arsenite may  
219 have a dual function: energy source [73, 74], as well as detoxification of the highly toxic

220 arsenite to arsenate [75]. Calcium arsenate was in fact observed inside intracellular structures  
221 of filamentous Tectomicrobia [68]. Arsenite oxidation is not necessarily limited to  
222 filamentous Tectomicrobia, in fact we also found the arsenite oxidase genes (*aoxAB*) in  
223 Alphaproteobacteria, Chloroflexi, and Nitrospinota MAGs (Figure 1, Table S4).

224 The pyruvate synthase or pyruvate:ferredoxin oxidoreductase (PFOR, EC 1.2.7.1),  
225 which is required for the rTCA cycle, can also serve different non-autotrophic functions, such  
226 as energy production through fermentation of pyruvate to acetate. For example, sediment  
227 Chloroflexi harboring PFOR and acetyl-CoA synthetase [EC 6.2.1.1]) were predicted to  
228 biosynthesize ATP using this pathway [76]. Here, PFOR was identified in five Chloroflexi  
229 MAGs (from *A. aerophoba*, *P. ficiformis* and *I. ramosa*) that lack carbon fixation pathways  
230 and may serve an energy production role. Accordingly, a high abundance of acetyl-CoA  
231 synthetase (COG1042) was previously detected in diverse sponge microbial metagenomes  
232 [77]. We therefore hypothesize that in the studied sponges ATP production involving  
233 pyruvate conversion to acetyl-CoA (by PFOR), coupled with acetate formation (by acetyl-  
234 CoA synthetase), occurs in five specialized, sponge-associated Chloroflexi (Figure 1,  
235 Figure S2, Table S4).

### 236 ***Lithoheterotrophy and metabolism of inorganic compounds in sponge symbionts***

237 We and others have detected genes for oxidation of diverse inorganic compounds,  
238 such as CO, nitrite, ammonia, and thiosulfate in the sponge microbial community [33–36].  
239 Further, we reveal the potential for hydrogen oxidation, specifically by the Tectomicrobia  
240 derived from *T. swinhoei* and in a Bacteroidetes MAG from *P. ficiformis* (Figure 1, Table S4,  
241 Figure S2). Nitrogen processing by diverse members of the sponge microbiome has been  
242 analyzed in several studies (*e.g.*, [33, 36]). It was suggested that ammonia oxidation in  
243 sponges is uniquely performed by Thaumarchaeota [36]. Nitrite can be oxidized to nitrate by  
244 members of Nitrospirota, Alphaproteobacteria and Gammaproteobacteria symbionts [35]. We

245 speculate that oxidation of nitrite to nitrate may only be carried out by Nitrospirota, rather  
246 than also by Proteobacteria, as previously proposed [35]. We base this speculation on a  
247 stricter annotation of the genes involved (*nrxAB*) using both HMM profiles and KEGG  
248 annotations (File S2).

249 Orthologues of *amoABC/pmoABC* genes (involved in ammonia and/or methane  
250 oxidation [78, 79], Table S2) were here found also in Desulfobacterota (unclassified  
251 Deltaproteobacteria based on NCBI taxonomy), specifically in two MAGs deriving from *A.*  
252 *aerophoba* and *P. ficiformis* (Table S4, File S2). Based on sequence similarity, we predict  
253 that *amoABC/pmoABC* of Desulfobacterota are involved in methane oxidation (File S2).  
254 Besides methane to methanol oxidation (EC 1.14.18.3), these MAGs also have the potential  
255 to further oxidize methanol to formaldehyde (EC:1.1.2.10) (Table S4). Genomic potential for  
256 methane to formaldehyde oxidation was previously discovered in sponges, but was not  
257 affiliated with members of Desulfobacterota [36, 80]. *amoABC/pmoABC* subunits were  
258 shown to be also expressed within the sponge *P. ficiformis* (details provided below).

259 CO-oxidizing bacteria are lithoheterotrophs common in sponge microbiomes. Large  
260 (CoxL, COG1529) and middle (CoxM, COG1319) subunits of the molybdenum-rich aerobic  
261 form of CODH (Mo-CODH) are highly overrepresented in sponge-associated *versus* seawater  
262 microbial metagenomes [34]. Mo-CODH has been identified in gamma and  
263 alphaproteobacterial sponge symbionts [33, 34] and found to be expressed among  
264 phylogenetically diverse symbionts including Actinobacteria, Chloroflexi and Proteobacteria  
265 [81]. Yet the function of CoxL is variable, and its homologues are not solely responsible for  
266 CO oxidation. In fact, CoxL was shown to comprise two different forms (I and II), with form  
267 II (putative *coxL*) being involved in functions alternative to CO oxidation [67]. To establish  
268 the extent to which CO oxidation is abundant in sponge symbionts, determine potential  
269 alternative substrates beyond CO, and provide this information at a taxonomic level, we set

270 the following criteria: (i) genomic potential for CO oxidation was based on the presence of 4  
271 subunits (*coxSMLG*) within MAGs, (ii) substrate specificity was based on clustering and  
272 reannotation of 2,406 translated *coxL* genes against the KO database and on reannotation of  
273 transcripts, (iii) taxonomy of transcripts was defined according to MAG-affiliation.

274 The Mo-CODH complex was found in 64% of all analyzed symbionts (Figure 1,  
275 Table S4), suggesting that CO oxidation is the most abundant process related to a  
276 lithoheterotrophic lifestyle in sponge symbionts. Overall, more than half of the protein  
277 sequences annotated as CoxL COG1529 belonged to Actinobacteria (29%) and Chloroflexi  
278 (22%), while Tectomicrobia and Actinobacteria had the highest average number of *coxL*  
279 genes (associated COG1529) per genome (Average = 29, SD = 5 and Average = 12, SD = 4,  
280 respectively) (Figure 3A). Among the two largest clusters, one is predicted to function as CO  
281 dehydrogenase (the mostly-orange cluster dominated by Actinobacteria, Figure 4), while the  
282 second large cluster could not be linked to any known function (the predominantly black  
283 cluster, where Chloroflexi prevail). Additional substrates for CoxL are likely isoquinoline  
284 (mostly violet cluster, dominated by Gammaproteobacteria) and nicotinate (green cluster,  
285 where Gemmatimonadetes and Chloroflexi prevail). Results therefore suggest that sponge  
286 symbionts can gain electrons from CO (lithoheterotrophs) and organic molecules (*e.g.*,  
287 isoquinoline and nicotinate; organoheterotrophs) via genes related to a large orthologous  
288 group - CoxL COG1529. Nevertheless, the substrate for more than half of the proteins  
289 annotated as CoxL COG1529 in sponge symbionts, remains unknown (black dots, Figure 4;  
290 N/A in Figure 3B).

291 While we showed here an extensive incidence of CODH within the sponge  
292 microbiome, some phyla were found to lack this functional capacity. Specifically, phyla with  
293 inherently autotrophic lifestyles (Cyanobacteria, Nitrospirota, and archaeal Thaumarchaeota)  
294 (Figure 2) and phyla specialized in the degradation of polysaccharide residues (Bacteroidota



295 [82, 83], Dadabacteria [84], and Verrucomicrobia [45, 85]), which did not contain CODH  
296 (Figure 3B). An exception are the 2 out of 17 Poribacteria, also characterized as degraders of  
297 diverse carbohydrate sources originating in the sponge matrix [36, 59, 86], which harbored  
298 CODH (Clade P1 in Figure 1). However, CoxL in these two Poribacteria might function in  
299 the oxidation of xanthin (see below), and they may thus not have a lithoheterotrophic  
300 lifestyle. Mo-CODH should be distinguished from Nickel-CODH, which relates to the  
301 anaerobic WL pathway. The latter was previously reported in sponge symbionts [21–23, 25],  
302 but based on our analysis (combining KEGG, COG and HMM profiles annotations, Table  
303 S2), we conclude that Nickel-CODH, and thus the WL pathway, is absent in the sponge  
304 microbiome.

305 Taken together results indicate that the presence of CoxL COG1529 in sponge  
306 symbionts can relate to both CO oxidation (as a part of CODH complex), and thus to a  
307 lithoheterotrophic lifestyle, or the oxidation of different organic substrates. Similarly to other  
308 symbiotic systems, including the human gut and legumes [67, 87], CO-oxidizing bacteria  
309 appear to have an essential role in the sponge holobiont. The potential sources for CO in  
310 sponges may include photoproduced CO derived from the ambient seawater [88, 89] and  
311 biological hemoprotein degradation via heme oxygenase (HO) activity [67, 87, 90]. Genomic  
312 potential for hemoprotein synthesis, transport and oxidation here found in specific members  
313 of the sponge microbiome, and suggested as a potential CO source in sponges, is discussed in  
314 File S2.

### 315 *Gene expression of carbon fixation and energy production pathways: case study of P.* 316 ***ficiformis***

317 To study the activity of key processes related to carbon fixation and energy  
318 production from oxidation of inorganic molecules, we conducted a genome-informed  
319 metatranscriptomic analysis of the *P. ficiformis*-associated community. We linked 50 MAGs

320 (Table S3) with an assembled metatranscriptome dataset derived from 39 *P. ficiformis*  
321 specimens. 35% of transcripts aligned to protein sequences.

322 Our gene expression results confirm the results derived from the wider MAG analysis  
323 described above on the importance of CO oxidation in sponge symbionts, and further  
324 corroborate that specific sub-orthologs of COG1529 might provide symbionts with the ability  
325 to utilize alternative organic electron donors. The latter may be part of the DOC (or its  
326 residues) that is concentrated by the host's filtration activity [91]. Similar to other sponge  
327 species, results show CO-oxidizing bacteria were highly abundant in the sponge *P. ficiformis*,  
328 with more than half of the MAGs (64%, n=50) harboring CODH (Figure 1, Table S4), and  
329 with all MAGs affiliated to Actinobacteria (n=13), Acidobacteria (n=4), and Chloroflexi  
330 (n=9) harboring CODH. Here, we tested how the widespread genomic potential for CO  
331 oxidation relates to its expression across different symbiotic microbial phyla.

332 We confirmed the expression of CO dehydrogenase (K03520) among eight phyla  
333 including Acidobacteria, Actinobacteria, and Chloroflexi (Figure 5A). Acidobacteria and  
334 Chloroflexi expressed all four subunits of CODH, while Actinobacteria, Desulfobacterota,  
335 and Latescibacterota did not express the *coxG* subunit. The *coxG* gene was also absent from  
336 the form 1 (*bona fide* CO dehydrogenase) Mo-CODH from the chemoautotroph  
337 *Alkalilimnicola ehrlichei* MLHE-1 [67], suggesting that the presence of this gene is not  
338 crucial for CO oxidation [92, 93]. Interestingly, while the auxiliary subunits of CODH,  
339 affiliated to poribacterial MAGs, were expressed, the large CO-oxidizing subunit was absent  
340 in the representatives of this phylum. This may be explained by the functional annotation of  
341 the CODH complex as xanthine dehydrogenase (EC 1.17.1.4) in Poribacteria (Figures 3B, 5A  
342 and 6), suggesting that this phylum does not oxidize CO in sponges. Functional and  
343 taxonomic specialization for certain subgroups of COG1529 was also observed for additional  
344 members of the *P. ficiformis* symbiotic microbial community (Figure 5). For instance, a

345 suborthologous group annotated as a subunit of xanthine dehydrogenase (K13482) was  
346 exclusively linked to a single actinobacterial MAG (Actino\_4, class *Acidimicrobiia*, order  
347 UBA5794, family SZUA-232), and a nicotinate dehydrogenase subunit (K18030) was linked  
348 to Gammaproteo\_5 (order *Pseudomonadales*, family HTCC2089) (Figure 6).

349         It has been suggested that CODH supplies energy for enhanced anaplerotic reactions  
350 by pyruvate carboxylase (PYC) in planktonic marine Alphaproteobacteria [3]. Anaplerotic  
351 carbon assimilation may contribute differently to the actual biomass accumulation ranging  
352 0.5–1.2% of the total carbon of cells [8] and 10-15% of protein [94] in different  
353 Alphaproteobacteria strains. Due to a high abundance of genes related to anaplerotic  
354 reactions (86%) within the fifty *P. ficiformis*-derived MAGs, we next determined the taxa  
355 that consistently expressed genes associated with anaplerotic carbon assimilation across  
356 multiple *P. ficiformis* specimens. Consistent expression by the same taxon across different  
357 specimens implies an enhanced anaplerotic flow, which can result in actual carbon  
358 assimilation due to relatively high carbon influx to the TCA cycle, while sporadic expression  
359 is more likely to be related to metabolic flexibility with periodical replenishment of TCA  
360 intermediates [4]. We observed prevalent expression ( $\geq 90\%$  of all samples,  $n=39$ ) of  
361 transcripts showing high similarity to anaplerotic proteins (PYC, malic enzyme [MEZ], and  
362 phosphoenolpyruvate carboxykinase [PCKA]) belonging to 3 Acidobacteria (order  
363 *Vicinamibacterales*), one Alphaproteobacteria (order UBA2966), and one Chloroflexi (order  
364 UBA3495). Thus, anaplerotic carbon assimilation in *P. ficiformis* might occur in  
365 Acidobacteria, Alphaproteobacteria and Chloroflexi. When genes were mapped against  
366 metatranscriptome reads, only the MAG-specific affiliation of *pckA* from Acidobacteria  
367 (MAG Acido\_2) was confirmed (Figure 7). We further observed correlations between  
368 expression levels of *coxL* and PCKA transcripts, linked to Acido\_2 MAGs, across twelve  
369 different *P. ficiformis* samples (Figure S3). In contrast to PYC, phosphoenolpyruvate

370 carboxylase (PPC) and MEZ, PCKA utilizes CO<sub>2</sub> rather than bicarbonate. We hypothesize  
371 that in Acido\_2 within *P. ficiformis* and, possibly, in closely related *Vicinamibacterales*  
372 symbionts of *I. ramosa* (Figure 1, Figure S2, Clade Acd1), inorganic carbon assimilation may  
373 occur by CoxL supplying CO<sub>2</sub> to the anaplerotic reaction catalyzed by PCKA.

374 Genomic potential for CBB was here found in symbionts of the Cyanobacteria and  
375 Proteobacterota (Gammaproteobacteria) phyla and was previously reported for Tectomicrobia  
376 [61]. Here we investigated the expression of the large subunit of RuBisCO (*rbcL*) in *P.*  
377 *ficiformis*. As expected, all samples that harbored Cyanobacteria (pink phenotype [31], n=12)  
378 showed expression of *rbcL*. In addition, we observed expression of a gammaproteobacterial  
379 *rbcL* in 30 (out of 39) samples (Figure 5C). This suggests that the Italian population of *P.*  
380 *ficiformis* (used for the transcriptomics data) is associated with a specific  
381 gammaproteobacterial symbiont with CBB activity, providing capability for dark fixation,  
382 while the Israeli population of *P. ficiformis* (used for obtaining MAGs) appears to lack this  
383 symbiont. A biogeographic effect on the microbial composition of *P. ficiformis* was reported  
384 before [32, 38].

385 Microbial carbon fixation can also occur through the 3-HP/4-HB cycle, which was  
386 suggested to be energetically fueled by ammonia oxidation in sponge-associated archaea [36].  
387 Thaumarchaeota MAGs from *P. ficiformis* harbored *amoABC* genes (Figure 1, Table S4) and  
388 expressed *amoC* (Figure S4), as well as acetyl-CoA/propionyl-CoA carboxylase, the key  
389 gene of the 3-HP/4-HB cycle (Figure 5C). These findings confirm the involvement of  
390 Thaumarchaeota in dark carbon fixation in this sponge species. Orthologues of  
391 *amoABC/pmoABC* were also found in Desulfobacterota from *P. ficiformis* and are attributed  
392 to methane oxidation as explained below. The *pmoA* subunit of this MAG was expressed in  
393 37 out of the 39 *P. ficiformis* samples suggesting a wide distribution for methane oxidation in  
394 *P. ficiformis* (Figure S4A).

395 ***Carbon fixation measurements in sponges***

396 Physiology experiments, using  $^{14}\text{C}$  labelled bicarbonate can test the ability of  
397 autotrophic carbon assimilation that is light dependent (photosynthetic activity) or that occurs  
398 in darkness (dark primary production). Two sponge species were used in the  $^{14}\text{C}$  labelled  
399 bicarbonate fixation experiments: (1) *P. ficiformis*, harboring *Ca. S. feldmannii*, and (2) *T.*  
400 *swinhoei*, with *Ca. S. spongiarum*. The latter sponge is also known to harbor a dense  
401 population of filamentous Tectomicrobia that have genomic potential to fix carbon *via* CBB,  
402 utilizing multiple inorganic energy sources (Table S4, Figure 1).

403 Light-mediated inorganic carbon fixation was detected in both species in the cortex  
404 (external layer) of the sponge, where Cyanobacteria reside. While on average *ca.* 81-97% of  
405 total (*i.e.* light+dark) carbon fixation occurred in light conditions in *P. ficiformis* (Figure 8B,  
406 D), the overall contribution of light fixation in *T. swinhoei* ranged between 46 and 78%  
407 (Figure 8A, C). Transfer of labelled photosynthates to internal sponge layers was only  
408 observed for *T. swinhoei* (Figure 8A). In contrast, the labeled photosynthates produced by  
409 *Ca. S. feldmannii* remained within the cortex of *P. ficiformis* (Figure 8B, D). The lack of  
410 contribution of fixed organic carbon from *Ca. S. feldmannii* to internal layers of the sponge  
411 host supports the previous hypothesis that the symbiotic role of this photosymbiont may not  
412 be directly related to its photosynthetic properties, and rather to protection from solar  
413 radiation via synthesis of pigments [31]. Accordingly, presence of a photosymbiont does not  
414 directly imply transfer of organic carbon to its host, and alternative benefits need to be  
415 investigated. Diverse trends in carbon contribution to the host were shown also for different  
416 sponge species harboring *Ca. S. spongiarum*, and it was suggested that such variability may  
417 relate to symbiont phylotypes (clades within *Ca. S. spongiarum*) [19, 26].

418 Chemosynthetic or dark carbon fixation in *T. swinhoei* represented 16.6-29.5% of  
419 total fixation. Besides symbiotic Thaumarchaeota [38] and Nitrospirota [95], *T. swinhoei* is

420 also known to harbor abundant filamentous Tectomicrobia ('Entotheonella'). This symbiont  
421 may therefore be the main organism responsible for the observed dark-fixation in this sponge  
422 species, by means of CBB cycle, fueled by a wide range of inorganic energy sources.

423 In contrast to *T. swinhoei*, dark fixation provided a relatively low contribution to total  
424 fixation (0.1-4.5%) in *P. ficiformis*. This, despite that *P. ficiformis* harbors Nitrospirota [31]  
425 and Thaumarchaeota [31, 38] symbionts, phyla that we show here as capable of dark carbon  
426 fixation via the rTCA and 3-HP/4-HB cycles, respectively. Both cycles are energetically  
427 fueled by different stages of nitrification, with ammonia and nitrite oxidation processes  
428 driven by Thaumarchaeota and Nitrospirota, respectively. However, ammonia oxidation rates  
429 were shown to be ten times lower than nitrite oxidation rates in the Mediterranean sponges  
430 *Dysidea avara* and *Chondrosia reniformis* [96], suggesting a larger influence of the rTCA  
431 compared to the 3-HP/4-HB cycle towards dark carbon fixation. If a similar trend is relevant  
432 also to *P. ficiformis*, then Thaumarchaeota may contribute little fixed carbon, resulting in the  
433 very low dark fixation observed in the <sup>14</sup>C-label experiments. Nitrospirota were reported to  
434 have low relative abundance and activity in *P. ficiformis* [31], which can also explain their  
435 low impact to the overall carbon fixation in the holobiont. Finally, non-photosynthetic CBB  
436 fixation by Gammaproteobacteria, shown in this study for Italian *P. ficiformis* specimens  
437 based on detection of *rbcL* transcripts, may not be relevant in Israeli *P. ficiformis* specimens,  
438 where homologues of the same *rbcL* gene were not detected in metagenomes or MAGs  
439 (Figure 1, Figure S6). Taken together with the <sup>14</sup>C-label experiments conducted on Israeli *P.*  
440 *ficiformis* specimens, chemoautotrophic pathways have only a minor influence on the overall  
441 carbon fixation compared to the photoautotrophic activity of *Ca. S. feldmannii*.

442 A decreasing pattern in H<sup>14</sup>CO<sub>3</sub><sup>-</sup> concentration in the medium in which the *P.*  
443 *ficiformis* cores were incubated was observed for both the Cyanobacteria-harboring cores  
444 (where H<sup>14</sup>CO<sub>3</sub><sup>-</sup> was fixed by *Ca. S. feldmannii*) (Figure S5A, B), and the white cores without

445 Cyanobacteria (Figure S5A, C). Killed samples (formalin controls) did not show decreasing  
446 patterns of  $\text{H}^{14}\text{CO}_3^-$  in the incubation medium (Figure S5), implying biologically active  
447 uptake in living cores in the dark as well as the light. Given the minimal dark fixation  
448 observed, we suggest that the uptake of  $\text{H}^{14}\text{CO}_3^-$  by the sponge in the dark resulted from  
449 assimilation of bicarbonate via anaplerotic reactions followed by immediate respiration of  
450 most of the assimilated carbon to  $\text{CO}_2$ .

451 If the dark-fixed  $\text{H}^{14}\text{CO}_3^-$  was indeed immediately respired back to  $\text{CO}_2$ , we should  
452 only have detected the decrease in labelled  $\text{H}^{14}\text{CO}_3^-$  in the seawater if it had remained trapped  
453 inside the sponge tissue. We thus conducted an additional experiment with white  
454 (Cyanobacteria-free) *P. ficiformis* cores incubated with  $\text{H}^{14}\text{CO}_3^-$  in the dark, and once the  
455 decrease of labelled  $\text{H}^{14}\text{CO}_3^-$  in the medium was detected, we crushed the sponge tissue. This  
456 resulted in an increase of label in the medium indicating release of the labeled  $\text{CO}_2$  from the  
457 sponge core back to the medium (Figure S5C). This supports a fast turnover of dark-fixed  
458  $\text{CO}_2$  in *P. ficiformis*, which might be related to anaplerotic carbon assimilation. Further,  
459 based on our results, anaplerotic carbon assimilation in *P. ficiformis* likely results in energy  
460 production rather than in biomass accumulation.

461 The anaplerotic rates in the laboratory conditions may be lower than in the natural  
462 environment, due to differences in accessibility to metabolically important compounds [97]  
463 such as electron donors (*e.g.*, pelagic CO). In fact, physiological experiments performed on  
464 planktonic Gammaproteobacteria showed increased rates of anaplerotic Ci assimilation when  
465 the appropriate energy source (*e.g.*, thiosulfate) and anaplerotic carbon acceptor (*e.g.*,  
466 pyruvate) were added [2]. We therefore cannot exclude that anaplerotic carbon assimilation  
467 in laboratory conditions might be different from the natural conditions.

468

469 **Conclusions**

470 We have shown that CO oxidation is ubiquitous in sponge symbionts, likely  
471 representing the main inorganic energy source for lithoheterotrophs. Different variations of  
472 CODH and *amoABC/pmoABC* found across symbiotic lineages have evolved towards  
473 oxidation of diverse inorganic (*e.g.*, CO and ammonia) and organic (*e.g.*, xanthine and  
474 methane) compounds, that may be dissolved in seawater, that is continuously pumped  
475 through the sponge water channels, or produced within the sponge holobiont. Anaerobic  
476 forms of CODH and the WL pathway, previously suggested as being part of the Ci-fixing  
477 metabolic repertoire of some sponge symbionts, were found to be absent from the sponge  
478 microbiome. Most sponge symbionts were found to be lithoheterotrophs or  
479 organoheterotrophs with the exception of taxonomically restricted groups of autotrophs that  
480 implement the 3-HP/4-HB, CBB, and rTCA pathways. We provide the first experimental  
481 evidence for dark fixation in sponges, particularly in *T. swinhoei*. We further suggest that  
482 dark fixation processes in *P. ficiformis* (and potentially other sponge species) may also  
483 involve anaplerotic carbon assimilation, which is likely carried out by Acidobacteria, and  
484 possibly also by Alphaproteobacteria and Chloroflexi. Finally, cyanobacterial  
485 *Parasynechococcus*-like symbionts were shown to be highly diverse in terms of their  
486 contribution to the overall holobiont carbon budget, with *Ca. S. spongiorum* sharing its  
487 photosynthates with the host, while *Ca. S. feldmannii* behaving as a ‘selfish’ guest.

488

#### 489 **Acknowledgments**

490 The authors thank the Inter-University Institute (IUI) in Eilat, Israel, for their  
491 technical support in SCUBA dives and laboratory availability for physiology experiments. LS  
492 wishes to warmly thank Prof. Sven Beer and Prof. Micha Ilan for support with the  
493 experiments on *T. swinhoei*. Dr. Eyal Rahav and Dr. Natasha Belkin are thanked for advice  
494 on radioactive measurements and calculations. Dr. Stefan Green, director of the DNA



495 Services Facility at the University of Illinois at Chicago (UIC) is thanked for useful  
496 comments and suggestions on sequencing strategies. The authors also thank Igor Chebotar,  
497 high performance computing system (HPC) administrator of the faculty of natural sciences at  
498 University of Haifa for his technical support in software and hardware assistance.

499

## 500 **Funding**

501 This work was supported by funds provided by the Israel Science Foundation [Grant  
502 No. 1243/16] and by the Gordon and Betty Moore Foundation, through Grant GBMF9352.

503

## 504 **Data availability**

505 MAGs from this study can be found under NCBI bioprojects ID PRJNA515489 (*P.*  
506 *ficiformis*), PRJNA255756 (*T. swinhoei*), PRJNA712987 (*A. aerophoba*) and PRJNA273429  
507 (*I. variabilis*).

508

## 509 **Conflict of interest statement**

510 The authors declare no conflict of interest.

511

## 512 **References**

- 513 1. Hügler M, Sievert SM. Beyond the Calvin cycle: autotrophic carbon fixation in the  
514 ocean. *Ann Rev Mar Sci* 2011; **3**: 261–289.
- 515 2. Sorokin DY. Oxidation of inorganic sulfur compounds by obligately organotrophic  
516 bacteria. *Microbiology* 2003; **72**: 641–653.
- 517 3. Moran MA, Buchan A, González JM, Heidelberg JF, Whitman WB, Klene RP, et al.  
518 Genome sequence of *Silicibacter pomeroyi* reveals adaptations to  
519 themarineenvironment. *Nature* 2004; **432**: 910–913.

- 520 4. Moran MA, Miller WL. Resourceful heterotrophs make the most of light in the coastal  
521 ocean. *Nat Rev Microbiol* 2007; **5**: 792–800.
- 522 5. Basu P, Sandhu N, Bhatt A, Singh A, Balhana R, Gobe I, et al. The anaplerotic node is  
523 essential for the intracellular survival of *Mycobacterium tuberculosis*. *J Biol Chem*  
524 2018; **293**: 5695–5704.
- 525 6. Machová I, Snášel J, Zimmermann M, Laubitz D, Plocinski P, Oehlmann W, et al.  
526 *Mycobacterium tuberculosis* phosphoenolpyruvate carboxykinase is regulated by  
527 redox mechanisms and interaction with thioredoxin. *J Biol Chem* 2014; **289**: 13066–  
528 13078.
- 529 7. Wan N, Wang H, Ng CK, Mukherjee M, Ren D, Cao B, et al. Bacterial metabolism  
530 during biofilm growth investigated by <sup>13</sup>C tracing. *Front Microbiol* 2018; **9**: 1–9.
- 531 8. Tang K, Yang Y, Lin D, Li S, Zhou W, Han Y, et al. Genomic, physiologic, and  
532 proteomic insights into metabolic versatility in *Roseobacter* clade bacteria isolated  
533 from deep-sea water. *Sci Rep* 2016; **6**: 1–12.
- 534 9. Simion P, Philippe H, Baurain D, Jager M, Richter DJ, Di Franco A, et al. A Large and  
535 consistent phylogenomic dataset supports sponges as the sister group to all other  
536 animals. *Curr Biol* 2017; **27**: 958–967.
- 537 10. Feuda R, Dohrmann M, Pett W, Philippe H, Rota-Stabelli O, Lartillot N, et al.  
538 Improved modeling of compositional heterogeneity supports sponges as sister to all  
539 other animals. *Curr Biol* 2017; 1–7.
- 540 11. de Goeij JM, van Oevelen D, Vermeij MJ a, Osinga R, Middelburg JJ, de Goeij  
541 AFPM, et al. Surviving in a marine desert: the sponge loop retains resources within  
542 coral reefs. *Science* 2013; **342**: 108–10.

- 543 12. Maldonado M. Sponge waste that fuels marine oligotrophic food webs: a re-  
544 assessment of its origin and nature. *Mar Ecol* 2016; **37**: 477–491.
- 545 13. Moitinho-Silva L, Nielsen S, Amir A, Gonzalez A, Ackermann GL, Cerrano C, et al.  
546 The sponge microbiome project. *Gigascience* 2017; **6**: gix077.
- 547 14. Hentschel U, Hopke J, Horn M, Anja B, Wagner M, Hacker J, et al. Molecular  
548 evidence for a uniform microbial community in sponges from different oceans  
549 molecular evidence for a uniform microbial community in sponges from different  
550 oceans. *Appl Environ Microbiol* 2002; **68**: 4431–4440.
- 551 15. Lafi FF, Fuerst J a., Fieseler L, Engels C, Goh WWL, Hentschel U. Widespread  
552 distribution of Poribacteria in Demospongiae. *Appl Environ Microbiol* 2009; **75**:  
553 5695–5699.
- 554 16. Taylor MW, Radax R, Steger D, Wagner M. Sponge-associated microorganisms:  
555 evolution, ecology, and biotechnological potential. *Microbiol Mol Biol Rev* 2007; **71**:  
556 295–347.
- 557 17. Webster NS, Taylor MW. Marine sponges and their microbial symbionts: love and  
558 other relationships. *Environ Microbiol* 2012; **14**: 335–46.
- 559 18. Rix L, Ribes M, Coma R, Jahn MT, de Goeij JM, van Oevelen D, et al. Heterotrophy  
560 in the earliest gut: a single-cell view of heterotrophic carbon and nitrogen assimilation  
561 in sponge-microbe symbioses. *ISME J* 2020; 1751–7370.
- 562 19. Freeman CJ, Thacker RW. Complex interactions between marine sponges and their  
563 symbiotic microbial communities. *Limnol Oceanogr* 2011; **56**: 1577–1586.
- 564 20. Botté ES, Nielsen S, Azmi M, Wahab A, Webster J, Robbins S, et al. Changes in the  
565 metabolic potential of the sponge microbiome under ocean acidification. *Nat Commun*

- 566           2019; **10**: 2041–1723.
- 567   21.   Bayer K, Jahn MT, Slaby BM, Moitinho-Silva L, Hentschel U. Marine sponges as  
568           *Chloroflexi* hot spots: Genomic insights and high-resolution visualization of an  
569           abundant and diverse symbiotic clade. *mSystems* 2018; **3**: e00150-18.
- 570   22.   Astudillo-García C, Slaby BM, Waite DW, Bayer K, Hentschel U, Taylor MW.  
571           Phylogeny and genomics of SAUL, an enigmatic bacterial lineage frequently  
572           associated with marine sponges. *Environ Microbiol* 2018; **20**: 561–576.
- 573   23.   Podell S, Blanton JM, Neu A, Agarwal V, Biggs JS, Moore BS, et al. Pangenomic  
574           comparison of globally distributed *Poribacteria* associated with sponge hosts and  
575           marine particles. *ISME J* 2019; **13**: 468–481.
- 576   24.   Engelberts JP, Robbins SJ, Goeij JM De, Webster NS, Aranda M, Bell SC, et al.  
577           Characterization of a sponge microbiome using an integrative genome-centric  
578           approach. *ISME J* 2020.
- 579   25.   Podell S, Blanton JM, Oliver A, Schorn MA, Agarwal V, Biggs JS, et al. A genomic  
580           view of trophic and metabolic diversity in clade-specific *Lamellodysidea* sponge  
581           microbiomes. *Microbiome* 2020; **8**: 2049–2618.
- 582   26.   Freeman CJ, Thacker RW, Baker DM, Fogel ML. Quality or quantity: is nutrient  
583           transfer driven more by symbiont identity and productivity than by symbiont  
584           abundance? *ISME J* 2013; **7**: 1116–25.
- 585   27.   Steindler L, Huchon D, Avni A, Ilan M. 16S rRNA phylogeny of sponge-associated  
586           Cyanobacteria. *Appl Environ Microbiol* 2005; **71**: 4127–4131.
- 587   28.   Simister RL, Deines P, Botté ES, Webster NS, Taylor MW. Sponge-specific clusters  
588           revisited: A comprehensive phylogeny of sponge-associated microorganisms. *Environ*

- 589            *Microbiol* 2012; **14**: 517–524.
- 590    29.    Burgsdorf I, Slaby BM, Handley KM, Haber M, Blom J, Marshall CW, et al. Lifestyle  
591            evolution in cyanobacterial symbionts of sponges. *MBio* 2015; **6**: e00391-15.
- 592    30.    Usher KM, Fromont J, Sutton DC, Toze S. The biogeography and phylogeny of  
593            unicellular cyanobacterial symbionts in sponges from Australia and the Mediterranean.  
594            *Microb Ecol* 2004; **48**: 167–77.
- 595    31.    Britstein M, Cerrano C, Burgsdorf I, Zoccarato L, Kenny N, Riesgo A, et al. Sponge  
596            microbiome stability during environmental acquisition of highly specific  
597            photosymbionts. *Environ Microbiol* 2020; **22**: 3593–3607.
- 598    32.    Burgsdorf I, Erwin PM, Lopez-Legentil S, Cerrano C, Haber M, Frenk S, et al.  
599            Biogeography rather than association with Cyanobacteria structures symbiotic  
600            microbial communities in the marine sponge *Petrosia ficiformis*. *Front Microbiol*  
601            2014; **5**: 529.
- 602    33.    Taylor JA, Palladino G, Wemheuer B, Steinert G, Sipkema D, Williams TJ, et al.  
603            Phylogeny resolved, metabolism revealed: functional radiation within a widespread  
604            and divergent clade of sponge symbionts. *ISME J* 2020.
- 605    34.    Thomas T, Rusch D, DeMaere MZ, Yung PY, Lewis M, Halpern A, et al. Functional  
606            genomic signatures of sponge bacteria reveal unique and shared features of symbiosis.  
607            *ISME J* 2010; **4**: 1557–1567.
- 608    35.    Engelberts JP, Robbins SJ, de Goeij JM, Aranda M, Bell SC, Webster NS.  
609            Characterization of a sponge microbiome using an integrative genome-centric  
610            approach. *ISME J* 2020.
- 611    36.    Robbins SJ, Song W, Engelberts JP, Glasl B, Slaby BM, Boyd J, et al. A genomic

- 612 view of the microbiome of coral reef demosponges. *ISME J* 2021.
- 613 37. Burgsdorf I, Handley KM, Bar-Shalom R, Erwin PM, Steindler L. Life at home and on  
614 the roam: Genomic adaptations reflect the dual lifestyle of an intracellular, facultative  
615 symbiont. *mSystems* 2019; **4**: e00057-19.
- 616 38. Haber M, Burgsdorf I, Handley KM, Rubin-Blum M, Steindler L. Genomic insights  
617 into the lifestyles of Thaumarchaeota inside sponges. *Front Microbiol* 2021; **11**: 3441.
- 618 39. Hyatt D, Chen G-L, LoCascio PF, Land ML, Larimer FW, Hauser LJ. Prodigal:  
619 prokaryotic gene recognition and translation initiation site identification. *BMC*  
620 *Bioinformatics* 2010; **11**: 119.
- 621 40. Aramaki T, Blanc-Mathieu R, Endo H, Ohkubo K, Kanehisa M, Goto S, et al.  
622 KofamKOALA: KEGG Ortholog assignment based on profile HMM and adaptive  
623 score threshold. *Bioinformatics* 2020; **36**: 2251–2252.
- 624 41. Anantharaman K, Brown CT, Hug LA, Sharon I, Castelle CJ, Probst AJ, et al.  
625 Thousands of microbial genomes shed light on interconnected biogeochemical  
626 processes in an aquifer system. *Nat Commun* 2016; **7**: 13219.
- 627 42. Eddy SR. Profile hidden Markov models. *Bioinformatics* 1998; **14**: 755–763.
- 628 43. Segata N, Börnigen D, Morgan XC, Huttenhower C. PhyloPhlAn is a new method for  
629 improved phylogenetic and taxonomic placement of microbes. *Nat Commun* 2013; **4**.
- 630 44. Stamatakis A. RAxML version 8: A tool for phylogenetic analysis and post-analysis of  
631 large phylogenies. *Bioinformatics* 2014; **30**: 1312–1313.
- 632 45. Sizikov S, Burgsdorf I, Handley K, Lahyani M, Haber M, Steindler L. Characterization  
633 of sponge-associated Verrucomicrobia: microcompartment-based sugar utilization  
634 and enhanced toxin-antitoxin modules as features of host-associated *Opitutales*.

- 635        *Environ Microbiol* 2020; **22**: 4669–4688.
- 636    46.    Parks DH, Chuvochina M, Waite DW, Rinke C, Skarszewski A, Chaumeil PA, et al. A  
637        standardized bacterial taxonomy based on genome phylogeny substantially revises the  
638        tree of life. *Nat Biotechnol* 2018; **36**: 996–1004.
- 639    47.    Letunic I, Bork P. Interactive Tree Of Life (iTOL): An online tool for phylogenetic  
640        tree display and annotation. *Bioinformatics* 2006; **23**: 127–128.
- 641    48.    Parks DH, Imelfort M, Skennerton CT, Hugenholtz P, Tyson GW. CheckM: assessing  
642        the quality of microbial genomes recovered from isolates, single cells, and  
643        metagenomes. *Cold Spring Harb Lab Press Method* 2015; **25**: 1043–1055.
- 644    49.    Patro R, Duggal G, Love MI, Irizarry RA, Kingsford C. Salmon provides fast and bias-  
645        aware quantification of transcript expression. *Nat Methods* 2017; **14**: 417–419.
- 646    50.    Bushnell B. BBMap: A Fast , Accurate , Splice-Aware Aligner. CA, USA Ernest  
647        Orlando Lawrence Berkeley Natl Lab Berkeley [sourceforge.net/projects/bbmap/](https://sourceforge.net/projects/bbmap/) 2014.
- 648    51.    Kanehisa M, Sato Y, Morishima K. BlastKOALA and GhostKOALA: KEGG Tools  
649        for Functional Characterization of Genome and Metagenome Sequences. *J Mol Biol*  
650        2016; **428**: 726–731.
- 651    52.    Wickham H. ggplot2: Elegant Graphics for Data Analysis. 2016. Springer-Verlag New  
652        York.
- 653    53.    Plotly Technologies Inc. Collaborative data science. 2015. Plotly Technologies Inc.  
654        Montréal, QC Date of publication.
- 655    54.    Wickham H. Reshaping data with the reshape package. *J Stat Softw* 2007; **21**: 1–20.
- 656    55.    Barter RL, Yu B. Superheat: An R package for creating beautiful and extendable

- 657 heatmaps for visualizing complex data. *J Comput Graph Stat* 2018; **27**: 910–922.
- 658 56. Astudillo-García C, Slaby BM, Waite DW, Bayer K, Hentschel U, Taylor MW.  
659 Phylogeny and genomics of SAUL, an enigmatic bacterial lineage frequently  
660 associated with marine sponges.
- 661 57. Britstein M, Devescovi G, Handley KM, Malik A, Haber M, Saurav K, et al. A new N  
662 -acyl homoserine lactone synthase in an uncultured symbiont of the red sea sponge  
663 *Theonella swinhoei*. *Appl Environ Microbiol* 2015; **82**: AEM.031111-15.
- 664 58. Gao Z, Wang Y, Tian R. Symbiotic adaptation drives genome streamlining of the  
665 cyanobacterial sponge symbiont “*Candidatus Synechococcus spongiarum*”. *MBio*  
666 2014; **5**: e00079-14.
- 667 59. Kamke J, Rinke C, Schwientek P, Mavromatis K, Ivanova N, Sczyrba A, et al. The  
668 candidate phylum Poribacteria by single-cell genomics: New insights into phylogeny,  
669 cell-compartmentation, eukaryote-like repeat proteins, and other genomic features.  
670 *PLoS One* 2014; **9**: e87353.
- 671 60. Karimi E, Slaby BM, Soares AR, Blom J, Hentschel U, Costa R. Metagenomic binning  
672 reveals versatile nutrient cycling and distinct adaptive features in alphaproteobacterial  
673 symbionts of marine sponges. *FEMS Microbiol Ecol* 2018; **94**.
- 674 61. Liu F, Li J, Feng G, Li Z. New genomic insights into “*Entotheonella*” symbionts in  
675 *Theonella swinhoei*: Mixotrophy, anaerobic adaptation, resilience, and interaction.  
676 *Front Microbiol* 2016; **7**: 1333.
- 677 62. Liu F, Li J, Li Z. Draft genome sequence of “*Candidatus Synechococcus spongiarum*”  
678 m9, binned from a metagenome of South China Sea sponge *Theonella swinhoei*.  
679 *Genome Announc* 2017; **5**: e01307-16.



- 680 63. Slaby BM, Hackl T, Horn H, Bayer K, Hentschel U. Metagenomic binning of a marine  
681 sponge microbiome reveals unity in defense but metabolic specialization. *Isme J* 2017;  
682 **11**: 2465–2478.
- 683 64. Tian RM, Wang Y, Bougouffa S, Gao ZM, Cai L, Bajic V, et al. Genomic analysis  
684 reveals versatile heterotrophic capacity of a potentially symbiotic sulfur-oxidizing  
685 bacterium in sponge. *Environ Microbiol* 2014; **16**: 3548–3561.
- 686 65. Wilson MC, Mori T, Rückert C, Uria AR, Helf MJ, Takada K, et al. An environmental  
687 bacterial taxon with a large and distinct metabolic repertoire. *Nature* 2014.
- 688 66. Gao Z-M, Zhou G-W, Huang H, Wang Y. The Cyanobacteria-dominated sponge  
689 *Dactylospongia elegans* in the South China Sea: Prokaryotic community and  
690 metagenomic insights. *Front Microbiol* 2017; **8**: 1387.
- 691 67. King GM, Weber CF. Distribution, diversity and ecology of aerobic CO-oxidizing  
692 bacteria. *Nat Rev Microbiol* 2007; **5**: 107–118.
- 693 68. Keren R, Mayzel B, Lavy A, Polishchuk I, Levy D, Fakra SC, et al. Sponge-associated  
694 bacteria mineralize arsenic and barium on intracellular vesicles. *Nat Commun* 2017; **8**:  
695 1–12.
- 696 69. Haygood DJFMG. Identification of the antifungal peptide-containing symbiont of the  
697 marine sponge *Theonella swinhoei* as a novel Gammaproteobacterium , ‘*Candidatus*  
698 *Entotheonella palauensis*’. *Mar Biol* 2000; **136**: 969–977.
- 699 70. Richardson DJ. Bacterial respiration: a flexible process for a changing environment.  
700 *Microbiology* 2000; **146** ( Pt 3): 551–571.
- 701 71. White DC, Sinclair PR. Branched electron-transport systems in Bacteria. In: Rose AH,  
702 Wilkinson JF (eds).1971. Academic Press, pp 173–211.

- 703 72. Mayzel B, Aizenberg J, Ilan M. The elemental composition of demospongiae from the  
704 Red Sea, Gulf of Aqaba. *PLoS One* 2014; **9**.
- 705 73. Santini JM, Vanden Hoven RN. Molybdenum-containing arsenite oxidase of the  
706 chemolithoautotrophic arsenite oxidizer NT-26. *J Bacteriol* 2004; **186**: 1614–1619.
- 707 74. Branco R, Francisco R, Chung AP, Morais PV. Identification of an aox system that  
708 requires cytochrome c in the highly arsenic-resistant bacterium *Ochrobactrum tritici*  
709 SCII24. *Appl Environ Microbiol* 2009; **75**: 5141–5147.
- 710 75. Anderson GL, Williams J, Hille R. The purification and characterization of arsenite  
711 oxidase from *Alcaligenes faecalis*, a molybdenum-containing hydroxylase. *J Biol*  
712 *Chem* 1992; **267**: 23674–23682.
- 713 76. Hug L a, Castelle CJ, Wrighton KC, Thomas BC, Sharon I, Frischkorn KR, et al.  
714 Community genomic analyses constrain the distribution of metabolic traits across the  
715 Chloroflexi phylum and indicate roles in sediment carbon cycling. *Microbiome* 2013;  
716 **1**: 22.
- 717 77. Fan L, Reynolds D, Liu M, Stark M, Kjelleberg S, Webster NS. Functional  
718 equivalence and evolutionary convergence in complex communities of microbial  
719 sponge symbionts. *Proc Natl Acad Sci U S A* 2012; **109**: E1878–E1887.
- 720 78. Bock E, Wagner M. Oxidation of Inorganic Nitrogen Compounds as an Energy  
721 Source. In: Rosenberg E, DeLong EF, Lory S, Stackebrandt E, Thompson F (eds). *The*  
722 *Prokaryotes: Prokaryotic Physiology and Biochemistry*. 2013. Springer Berlin  
723 Heidelberg, Berlin, Heidelberg, pp 83–118.
- 724 79. Lontoh S, DiSpirito AA, Krema CL, Whittaker MR, Hooper AB, Semrau JD.  
725 Differential inhibition in vivo of ammonia monooxygenase, soluble methane

- 726 monoxygenase and membrane-associated methane monoxygenase by  
727 phenylacetylene. *Environ Microbiol* 2000; **2**: 485–494.
- 728 80. Glasl B, Robbins S, Frade PR, Marangon E, Laffy PW, Bourne DG, et al. Comparative  
729 genome-centric analysis reveals seasonal variation in the function of coral reef  
730 microbiomes. *ISME J* 2020; **14**: 1435–1450.
- 731 81. Feng G, Zhang F, Banakar S, Karlep L, Li Z. Analysis of functional gene transcripts  
732 suggests active CO<sub>2</sub> assimilation and CO oxidation by diverse bacteria in marine  
733 sponges. *FEMS Microbiol Ecol* 2019; **95**.
- 734 82. Rajilić-Stojanović M, de Vos WM. The first 1000 cultured species of the human  
735 gastrointestinal microbiota. *FEMS Microbiol Rev* 2014; **38**: 996–1047.
- 736 83. Grondin JM, Tamura K, Déjean G, Abbott DW, Brumer H. Polysaccharide utilization  
737 loci: Fueling microbial communities. *J Bacteriol* 2017; **199**: 1–15.
- 738 84. Graham ED, Tully BJ. Marine Dadabacteria exhibit genome streamlining and  
739 phototrophy-driven niche partitioning. *ISME J* 2020.
- 740 85. Sichert A, Corzett CH, Schechter MS, Unfried F, Markert S, Becher D, et al.  
741 *Verrucomicrobia* use hundreds of enzymes to digest the algal polysaccharide fucoidan.  
742 *Nat Microbiol* 2020.
- 743 86. Jahn MT, Markert SM, Ryu T, Ravasi T, Stigloher C, Hentschel U, et al. Shedding  
744 light on cell compartmentation in the candidate phylum *Poribacteria* by high  
745 resolution visualisation and transcriptional profiling. *Sci Rep* 2016; **6**: 35860.
- 746 87. Hopper CP, De La Cruz LK, Lyles K V., Wareham LK, Gilbert JA, Eichenbaum Z, et  
747 al. Role of carbon monoxide in host–gut microbiome communication. *Chem Rev* 2020.
- 748 88. Stubbins A, Hubbard V, Uher G, Law CS, Upstill-Goddard RC, Aiken GR, et al.

- 749 Relating carbon monoxide photoproduction to dissolved organic matter functionality.  
750 *Environ Sci Technol* 2008; **42**: 3271–3276.
- 751 89. Zuo Y, Jones RD. Formation of carbon monoxide by photolysis of dissolved marine  
752 organic material and its significance in the carbon cycling of the oceans.  
753 *Naturwissenschaften* 1995; **82**: 472–274.
- 754 90. King GM, Crosby H. Impacts of plant roots on soil CO cycling and soil-atmosphere  
755 CO exchange. *Glob Chang Biol* 2002; **8**: 1085–1093.
- 756 91. Pita L, Rix L, Slaby BM, Franke A, Hentschel U. The sponge holobiont in a changing  
757 ocean: from microbes to ecosystems. *Microbiome* 2018; **6**: 46.
- 758 92. Gourlay C, Nielsen DJ, Evans DJ, White JM, Young CG. Models for aerobic carbon  
759 monoxide dehydrogenase: Synthesis, characterization and reactivity of paramagnetic  
760 MoVO( $\mu$ -S)CuI complexes. *Chem Sci* 2018; **9**: 876–888.
- 761 93. Wilcoxon J, Zhang B, Hille R. The Reaction of the molybdenum- and copper-  
762 containing carbon monoxide dehydrogenase from *Oligotropha carboxydovorans* with  
763 quinones. *Biochemistry* 2011; **50**: 1910–1916.
- 764 94. Tang KH, Feng X, Tang YJ, Blankenship RE. Carbohydrate metabolism and carbon  
765 fixation in *Roseobacter denitrificans* OCh114. *PLoS One* 2009; **4**.
- 766 95. Schmitt S, Tsai P, Bell J, Fromont J, Ilan M, Lindquist N, et al. Assessing the complex  
767 sponge microbiota: core, variable and species-specific bacterial communities in marine  
768 sponges. *ISME J* 2012; **6**: 564–76.
- 769 96. Schläppy ML, Schöttner SI, Lavik G, Kuypers MMM, de Beer D, Hoffmann F.  
770 Evidence of nitrification and denitrification in high and low microbial abundance  
771 sponges. *Mar Biol* 2010; **157**: 593–602.

772 97. Hesselsoe M, Nielsen JL, Roslev P, Nielsen PH. Isotope labeling and  
773 microautoradiography of active heterotrophic bacteria on the basis of assimilation of  
774  $^{14}\text{CO}_2$ . *Appl Environ Microbiol* 2005; **71**: 646–655.

775

## 776 **Figure legends**

777 **Figure 1. Phylogenomic tree showing the distribution and diversity of carbon**  
778 **assimilation and energy production pathways across microbial symbiont taxonomy and**  
779 **host species.** The phylogenomic tree (N=399 MAGs) was constructed based on concatenated  
780 universal markers (PhyloPhlAn2). Labels marked with a hollow star are MAGs assembled in  
781 this study from the *P. ficiformis* specimen 277c. Labels marked with a colored star are eight  
782 MAGs assembled from the *A. aerophoba* specimen 15, *T. swinhoei* specimen SP3 and *I.*  
783 *variabilis* specimen 142. The tree is rooted to the Archaea group. Figure S6 represents an  
784 enhanced version (MAGs names are displayed) of this tree. Acd1, class Vicinamibacteria,  
785 order Vicinamibacterales, family UBA8438. C1, order Cyanobacteriales, family  
786 Desertifilaceae. C2, order Synechococcales, family Cyanobiaceae. CHL1, class  
787 Dehalococcoidia, order UBA3495. CHL2, class Anaerolineae, order SBR1031. G1, order  
788 GCA-2729495. G2, order UBA10353, family LS-SOB. G3 (single MAG), order UBA4575.  
789 G4, order Pseudomonadales, Pseudohongiellaceae family. G5, order Pseudomonadales,  
790 HTCC2089 family. P1, class and order WGA-4E, unknown family. S1, unknown class. S2,  
791 UBA2968 class and order. Poribacteria\_ADFK02.1\_Kamke\_2014,  
792 Poribacteria\_AQPC01.1\_Kamke\_2014 and Poribacteria\_ASZM01.1\_Kamke\_2014 were  
793 excluded from the phylogenomic tree due to incomplete marker genes set.

794 \*CO is not always a target molecule for the *coxSMLG* complex as it was shown here  
795 for *Poribacteria*.

796

797 **Figure 2. Predicted lifestyle for different taxonomic groups (Phylum/Class) of**  
798 **sponge symbionts.** Heat map represents percentage of genomes with predicted lifestyle, text  
799 represents number of MAGs. The colors of the MAGs correspond to the most abundant  
800 lifestyle: lithoheterotrophs (red), autotrophs implementing CBB (green) and other  
801 chemoautotrophs (violet). The relevant functions can be found in Table S4. Here, heterotroph  
802 means organoheterotroph. AR, anaplerotic reaction.

803 \*MAGs of Tectomicrobia (Entotheonellia) class possess incomplete genomic potential  
804 for utilization of CBB pathways.

805

806 **Figure 3. Functional diversity and distribution of COG1529 orthologs across**  
807 **symbiotic bacterial phyla.** (A) Number of proteins annotated as COG1529 per genome in  
808 different taxonomic groups (Phylum/Class) of sponge symbionts. (B) Functional diversity of  
809 the COG1529 orthologous group. Heat map represents percentages of genes with various  
810 functions (KEGG annotation) for different taxonomic groups (Phylum/Class) of sponge  
811 symbionts. Text represents number of sequences. Percentages of CO-oxidizing *coxL*  
812 (K03520) out of total COG1529 are presented on the right. K03520, CO; K07303,  
813 isoquinoline; K11177, xanthine; K18030, nicotinate; K16877, 2-furoyl-CoA; K07469,  
814 aldehyde; K12528, selenate; K11178, xanthine; K03518, CO; K09386, CO (KO annotation,  
815 target molecule).

816

817 **Figure 4. Taxonomic affiliation and hypothesized substrate for CoxL (COG1529)**  
818 **across diversity of sponge-associated MAGs (N=402).** Visualization of sequence-based  
819 clustering of 2406 proteins annotated as COG1529. Size of the dots is proportional to the  
820 length of the protein (in the range of 35-1250 amino acids, average = 682, SD = 207 amino  
821 acids). 720 out of 867 sequences forming the largest group (the predominantly black cluster)

822 have unknown function. 674 out of 784 sequences forming the second largest group (the  
823 predominantly orange cluster) were annotated as Mo-binding subunit of the CO  
824 dehydrogenase (K03520).

825

826 **Figure 5. Expression of carbon assimilation and CO oxidation-related functions**

827 **in the different phyla of *P. ficiformis* symbionts.** The analyses are based on cumulative

828 binary (1 – expressed, 0 – not expressed) expression of transcripts (N=39 transcriptomes).

829 Transcripts with the same function and MAG affiliations are merged. (A) the four subunits of

830 CODH (subunits with the same taxonomy are connected by lines), (B) anaplerotic fixation,

831 and (C) carbon assimilation genes. Taxonomy of transcripts was assigned if the transcript was

832 linked to the gene of the assembled MAG. Larger dots represent proportion of expression

833 across samples for a certain taxonomy group (Phylum/Class). Transcripts with not assigned

834 (NA) taxonomy (not linked to any assembled MAG) are given as black dots representing

835 mean values (A) or violin plots representing overall distribution of transcripts (B and C).

836 Genes: *mez*, malic enzyme; *pckA*, phosphoenolpyruvate carboxykinase; *ppc*,

837 phosphoenolpyruvate carboxylase; *pyc*, pyruvate carboxylase; *accA*, subunit of acetyl-CoA

838 carboxylase; *hyuA*, subunit of acetone carboxylase; *porA*, subunit of pyruvate synthase

839 (PFOR); *rbcL*, large subunit of RuBisCO.

840

841 **Figure 6. Expression of COG1529 and the variety of its hypothesized target**

842 **molecules across phyla/classes of sponge symbionts in *P. ficiformis*.** The analyses are

843 based on cumulative binary (1 – expressed, 0 – not expressed) expression of transcripts with

844 the same function and taxonomy (transcripts with the same KEGG annotations and MAG

845 affiliations are merged) related to the different transcripts annotated as COG1529 across 39

846 samples of *P. ficiformis*. Taxonomy of transcripts is assigned if the transcript was linked to

847 the gene of the assembled MAG. The potential target molecule is written in brackets. Larger  
848 dots represent proportion of expression across samples (average values from the binary data)  
849 for a certain taxonomy group (Phylum/Class). Violin plots (B and C) represent distribution of  
850 transcripts with no assigned taxonomy (NA).

851

852 **Figure 7. Anaplerotic carbon assimilation in *P. ficiformis* based on gene**  
853 **expression data (N=39).** Cumulative binary expressions of transcripts related to anaplerotic  
854 carbon assimilation with identical functional (in bracket) and species (linked to a certain  
855 MAG) affiliations. Larger dots represent proportion of expression across samples. Genes that  
856 showed prevalent expression (>90% of samples) and their prevalence were also confirmed by  
857 direct mapping against the metatranscriptome reads (>90% of samples) are marked in red.  
858 MEZ, malic enzyme; PCKA, phosphoenolpyruvate carboxykinase; PPC,  
859 phosphoenolpyruvate carboxylase; PYC, pyruvate carboxylase.

860

861 **Figure 8. Light and dark carbon fixation in *T. swinhoei* (left insert) and *P.***  
862 ***ficiformis* (right insert).** In inserts, circles schematically represent cores with numbers of  
863 replications. Amounts ( $\mu\text{g/g}$ ) of fixed labeled  $\text{C}_i$  across parallel sections of the sponge,  
864 including the most external (outer 2 mm, harboring cyanobacterial symbionts) and internal  
865 (cyanobacteria-free) sections. (A and C) Two specimens of *T. swinhoei* were used for each  
866 experiment, one was incubated in light and one in dark for two hours. At the end of the  
867 incubation, cylinders were cut out of the sponge and divided into 6-7 sections to establish  
868 labeled carbon fixation. Mean  $\pm$  SD (n= 9 (A), and n= 7 (C) for light and n=10 (A), and n= 8  
869 (C) dark conditions). CaSs, *Ca. S. spongiarum*. (B and D) Cores derived from light  
870 (cyanobacteria harboring) and dark (cyanobacteria-free) exposed parts of one specimen of *P.*  
871 *ficiformis* for each experiment were incubated for two hours with  $\text{H}^{14}\text{CO}_3^-$ , cores were then



872 cut and divided into 3 sections to establish labeled carbon fixation. Mean  $\pm$  SD (n=4 for light  
873 and n=4 for dark conditions). CaSf, *Ca. S. feldmannii*.



Tree scale: 1

**bootstrap**

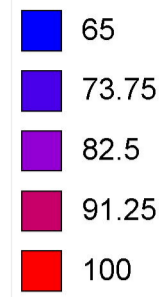

**Phylum / Class (colored ranges)**

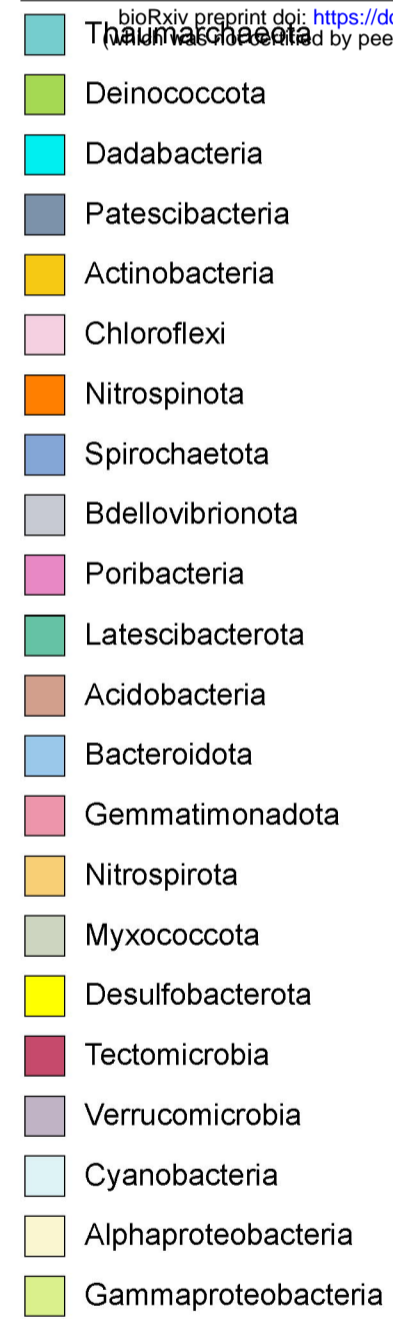

bioRxiv preprint doi: <https://doi.org/10.1101/2021.08.28.458021>; this version posted August 29, 2021. The copyright holder for this preprint (which was not certified by peer review) is the author/funder, who has granted bioRxiv a license to display the preprint in perpetuity. It is made available under aCC-BY-NC-ND 4.0 International license.

**Sponge species (color strips)**

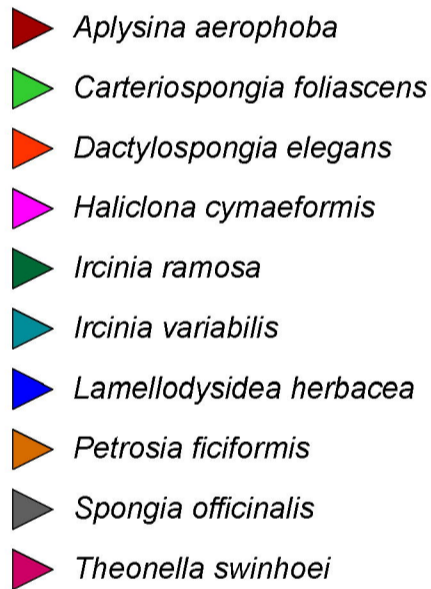

**Oxidation**

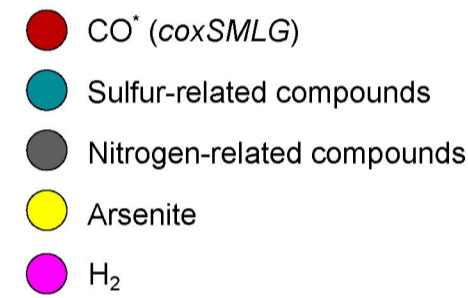

**Carbon assimilation and related**

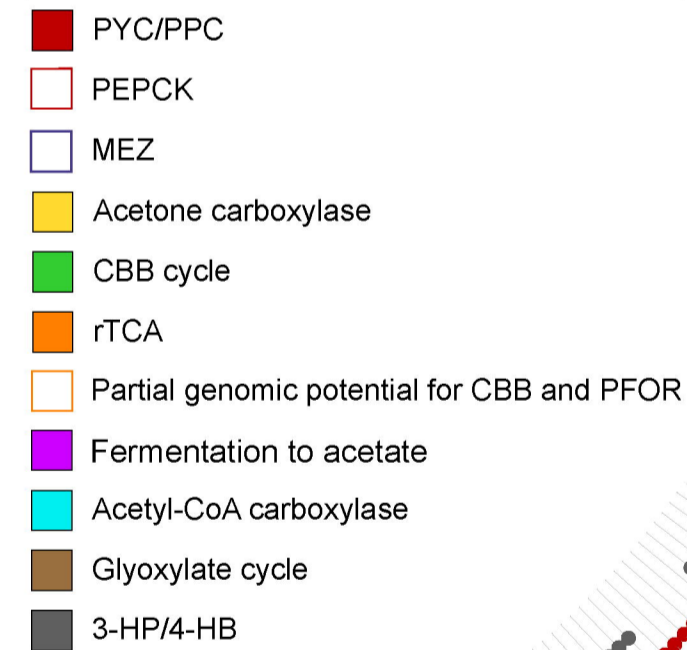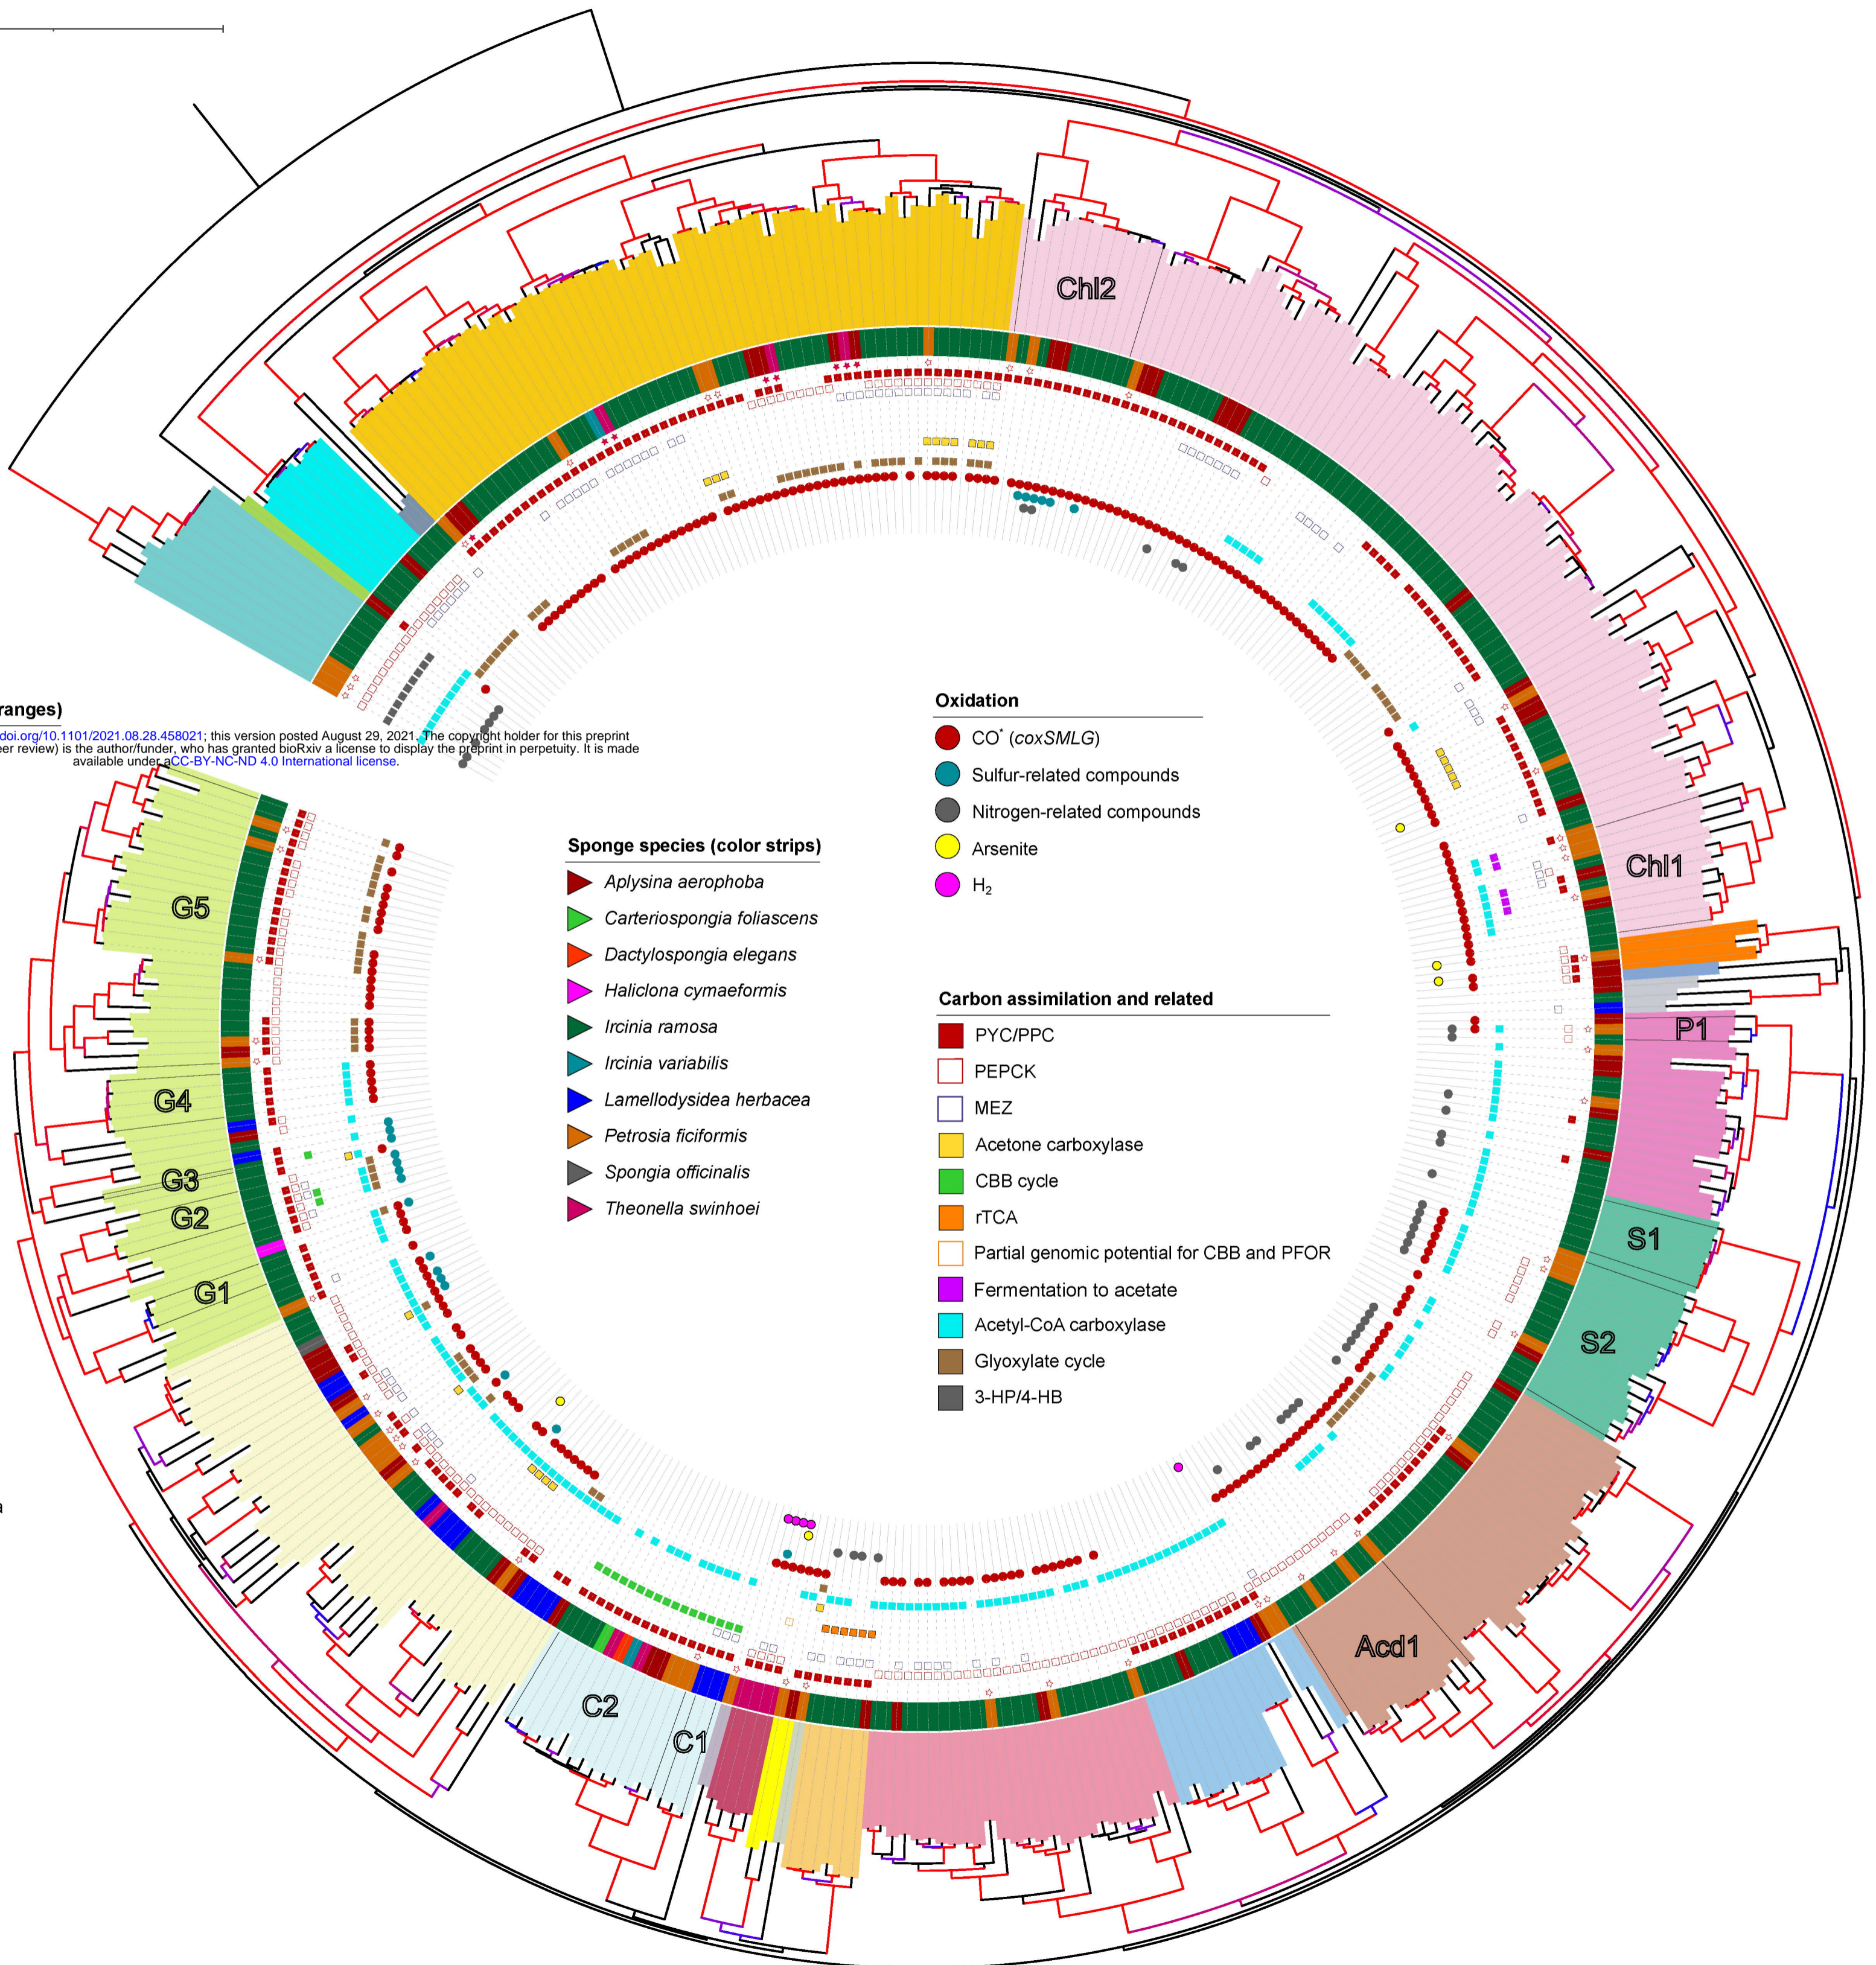



|                     |   |   |    |    |    |   |    |    |    |
|---------------------|---|---|----|----|----|---|----|----|----|
| Bacteroidota        | 0 | 0 | 0  | 0  | 14 | 0 | 0  | 0  | 1  |
| Actinobacteria      | 0 | 0 | 0  | 0  | 5  | 0 | 0  | 0  | 53 |
| Gemmatimonadota     | 0 | 0 | 0  | 0  | 5  | 0 | 0  | 0  | 21 |
| Nitrospinota        | 0 | 0 | 0  | 0  | 1  | 0 | 0  | 0  | 2  |
| Alphaproteobacteria | 0 | 0 | 0  | 0  | 8  | 0 | 3  | 0  | 28 |
| Spirochaetota       | 0 | 0 | 0  | 0  | 0  | 0 | 0  | 0  | 1  |
| Myxococcota         | 0 | 0 | 0  | 0  | 0  | 0 | 0  | 0  | 1  |
| Deinococcota        | 0 | 0 | 0  | 0  | 0  | 0 | 0  | 0  | 1  |
| Tectomicrobia       | 0 | 0 | 0  | 0* | 0  | 0 | 0  | 0  | 4  |
| Desulfobacterota    | 0 | 0 | 0  | 0  | 0  | 0 | 0  | 1  | 1  |
| Acidobacteria       | 0 | 0 | 0  | 0  | 0  | 0 | 0  | 1  | 30 |
| Gammaproteobacteria | 0 | 0 | 0  | 3  | 12 | 0 | 0  | 2  | 33 |
| Latescibacterota    | 0 | 0 | 0  | 0  | 1  | 0 | 6  | 7  | 6  |
| Poribacteria        | 0 | 0 | 0  | 0  | 1  | 0 | 12 | 4  | 3  |
| Chloroflexi         | 0 | 0 | 0  | 0  | 13 | 4 | 1  | 14 | 54 |
| Thaumarchaeota      | 0 | 9 | 0  | 0  | 0  | 0 | 0  | 0  | 0  |
| Patescibacteria     | 0 | 0 | 0  | 0  | 1  | 0 | 1  | 0  | 0  |
| Bdellovibrionota    | 0 | 0 | 0  | 0  | 1  | 0 | 2  | 0  | 0  |
| Verrucomicrobia     | 0 | 0 | 0  | 0  | 0  | 0 | 1  | 0  | 0  |
| Cyanobacteria       | 0 | 0 | 17 | 0  | 0  | 0 | 0  | 0  | 0  |
| Nitrospirota        | 6 | 0 | 0  | 0  | 0  | 0 | 0  | 0  | 0  |
| Dadabacteria        | 0 | 0 | 0  | 0  | 7  | 0 | 0  | 0  | 0  |

*rTCA*  
*3-HP/4-HB*  
*Photoautotrophic CBB cycle*  
*Chemoautotrophic CBB cycle*  
*Heterotrophs with AR*  
*Fermentation to acetate*  
*Heterotrophs*  
*Lithoheterotrophs*  
*Lithoheterotrophs with AR*

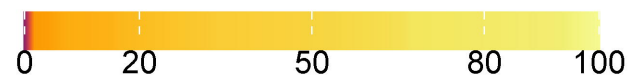

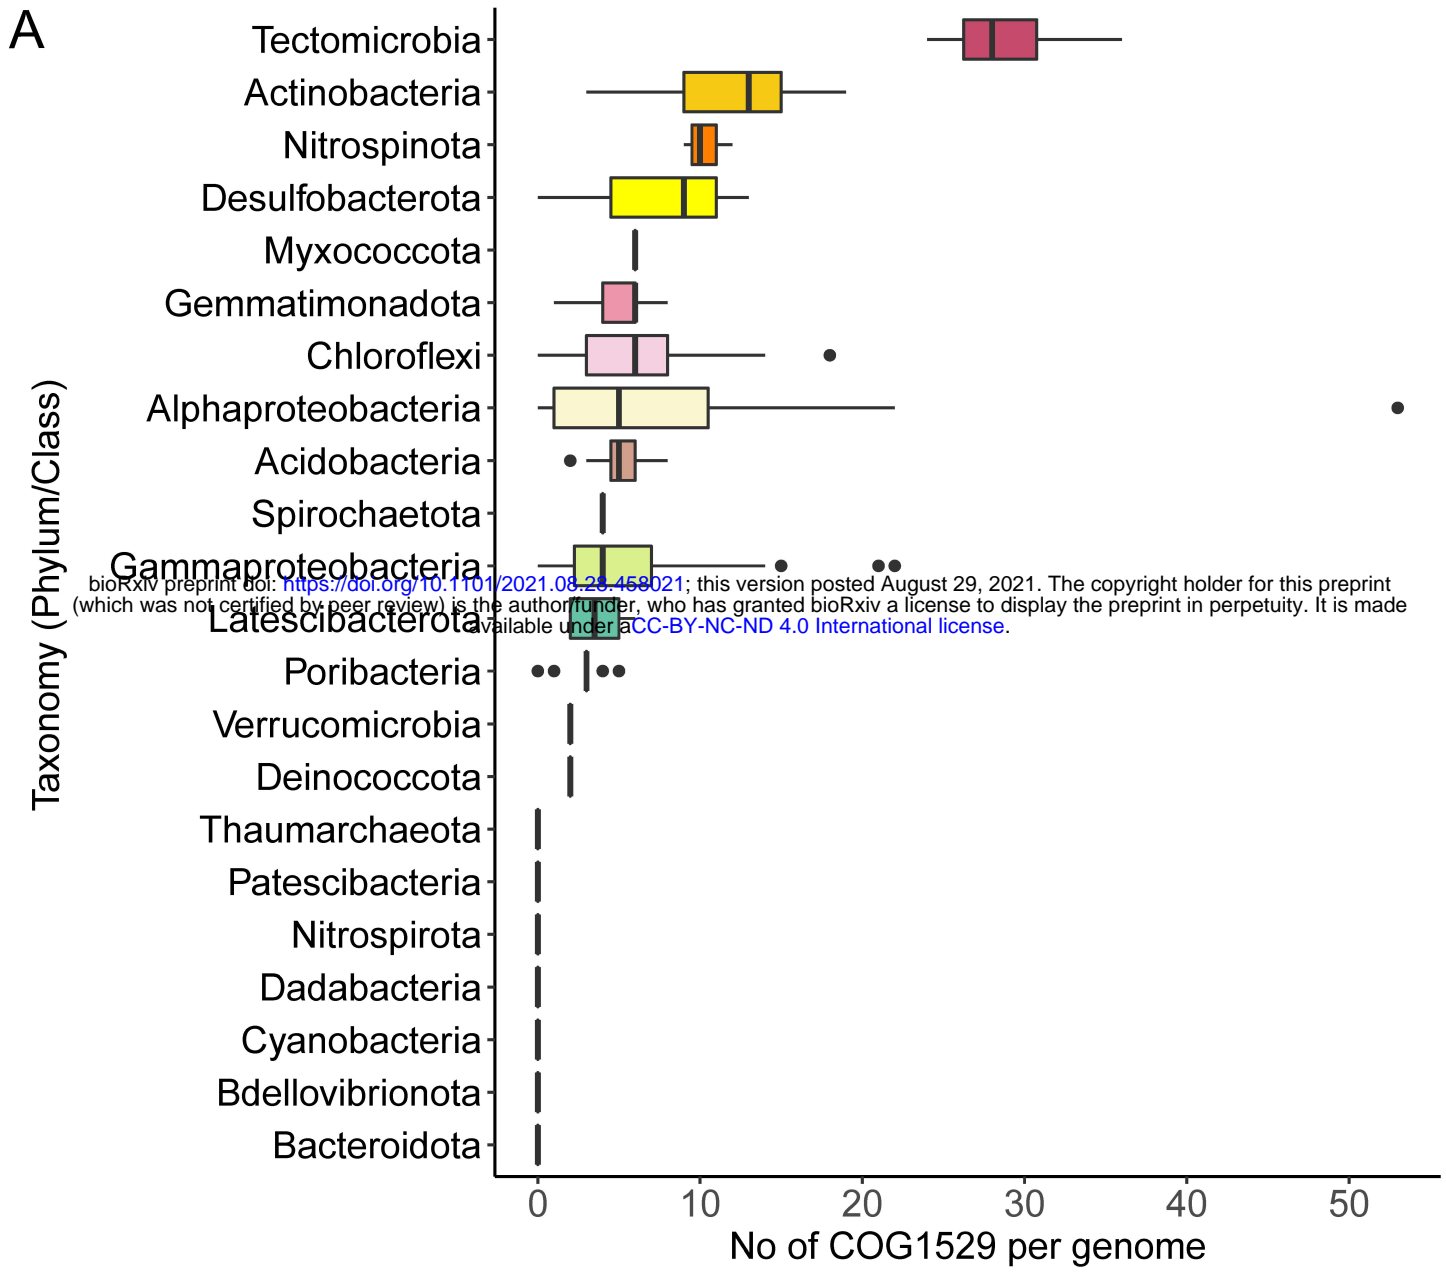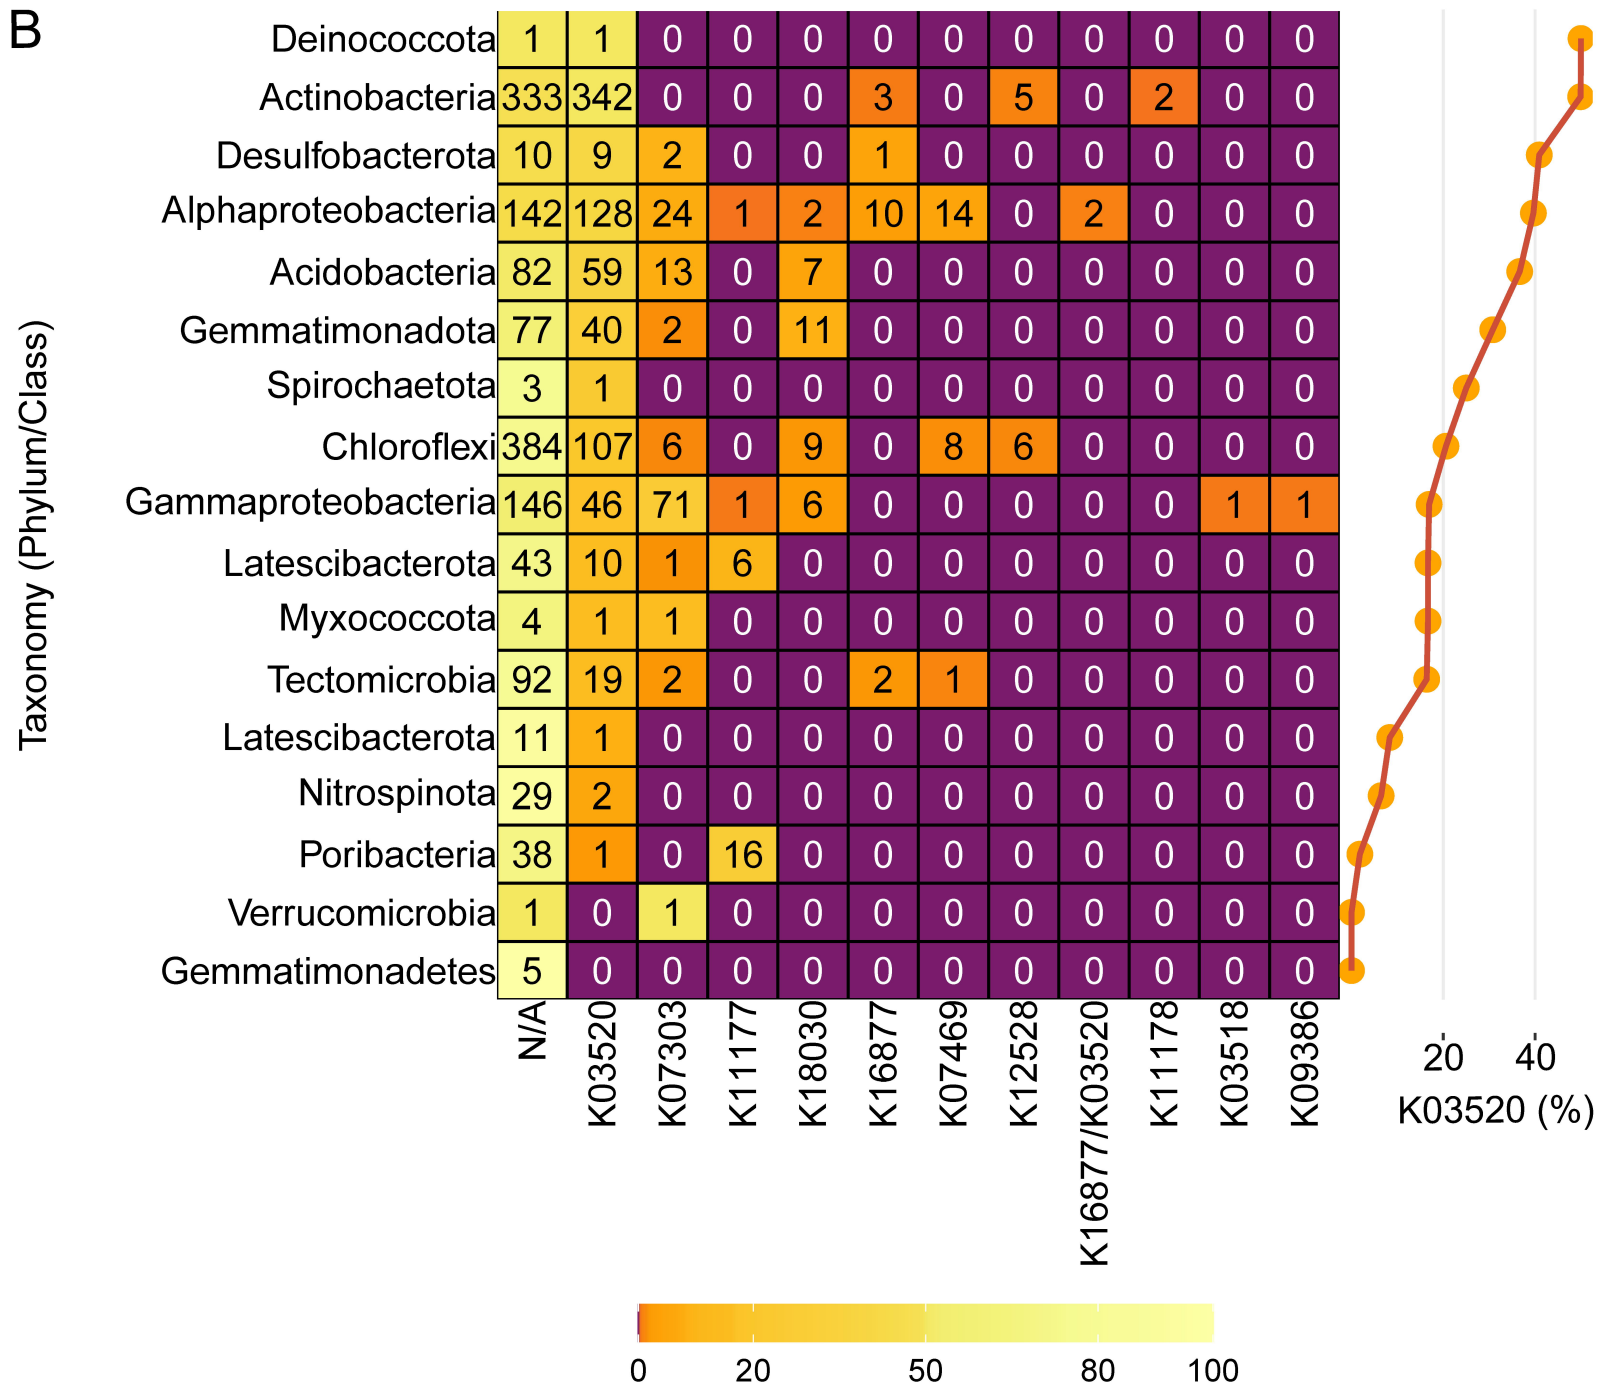

- NA
- K18030
- K03520
- K11177
- K07303
- K07469

Chloroflexi (100%)

nicotinate  
Gemmatimonadota (41%)

Gemmatimonadota (35%)

Chloroflexi (35%)

Actinobacteria (43%)

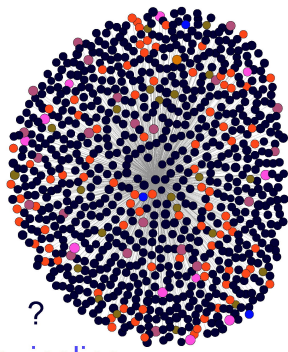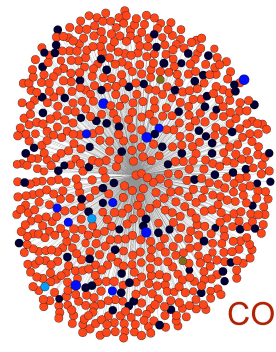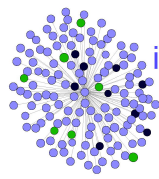

isoquinoline  
Gammaproteobacteria (57%)

Actinobacteria (34%)

Actinobacteria (42%)

Actinobacteria (32%)

- K16877
- K09386
- K12528
- K03518
- K11178
- K16877/K03520



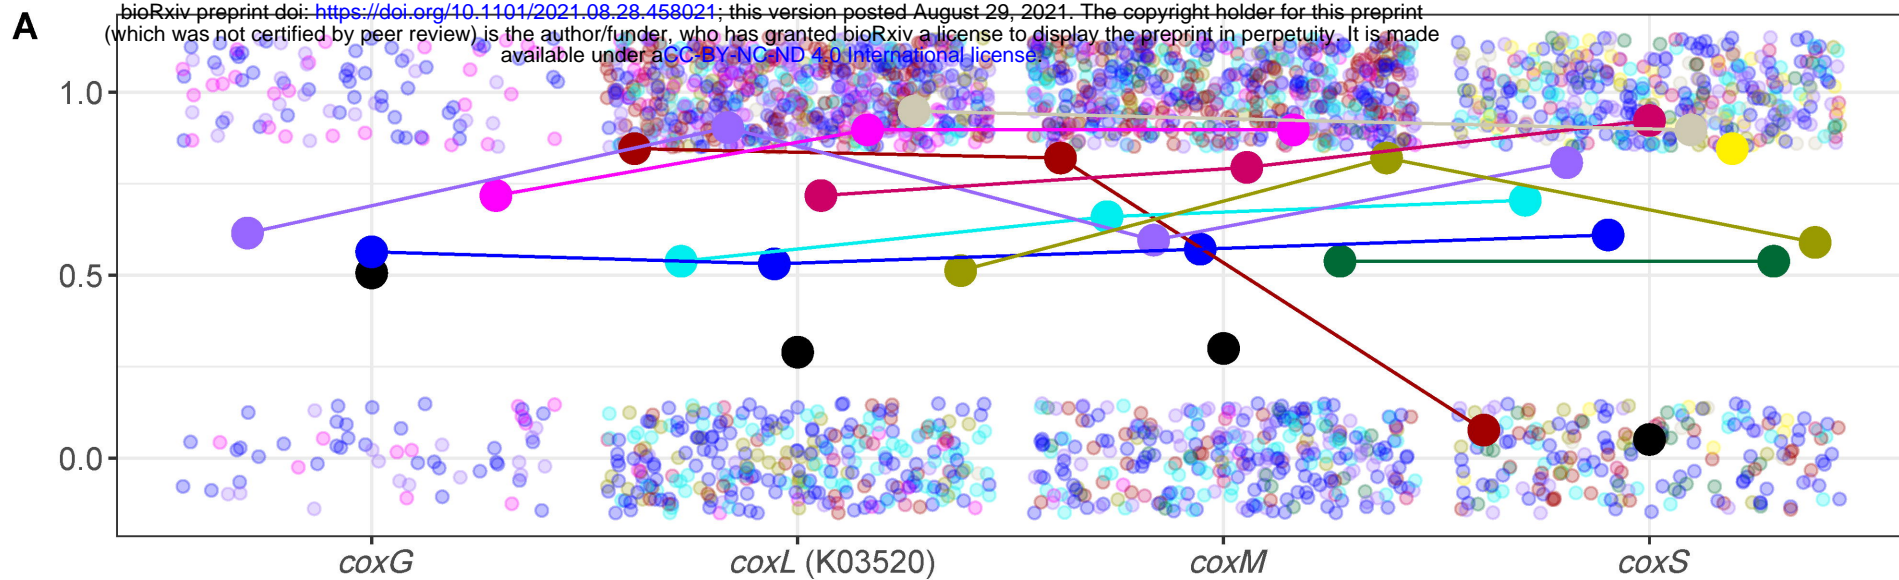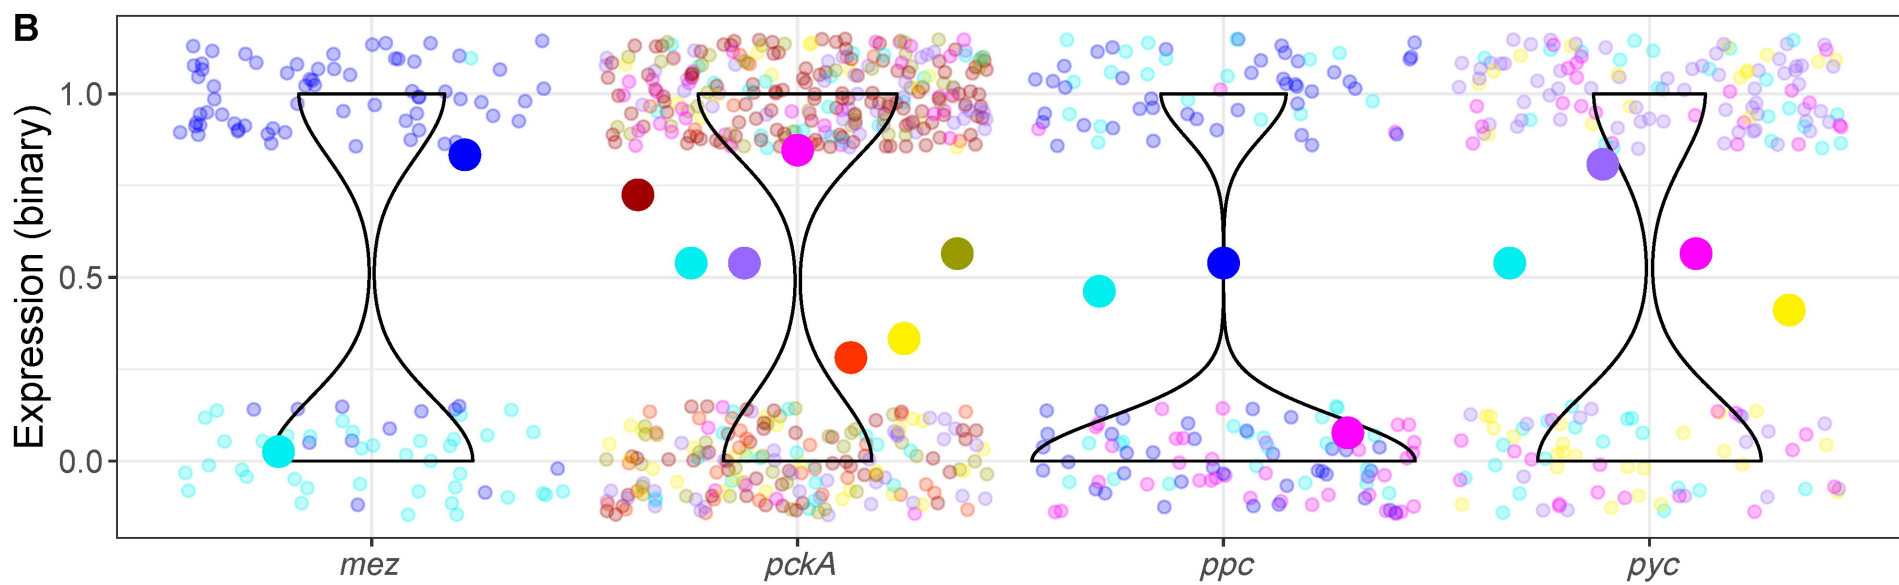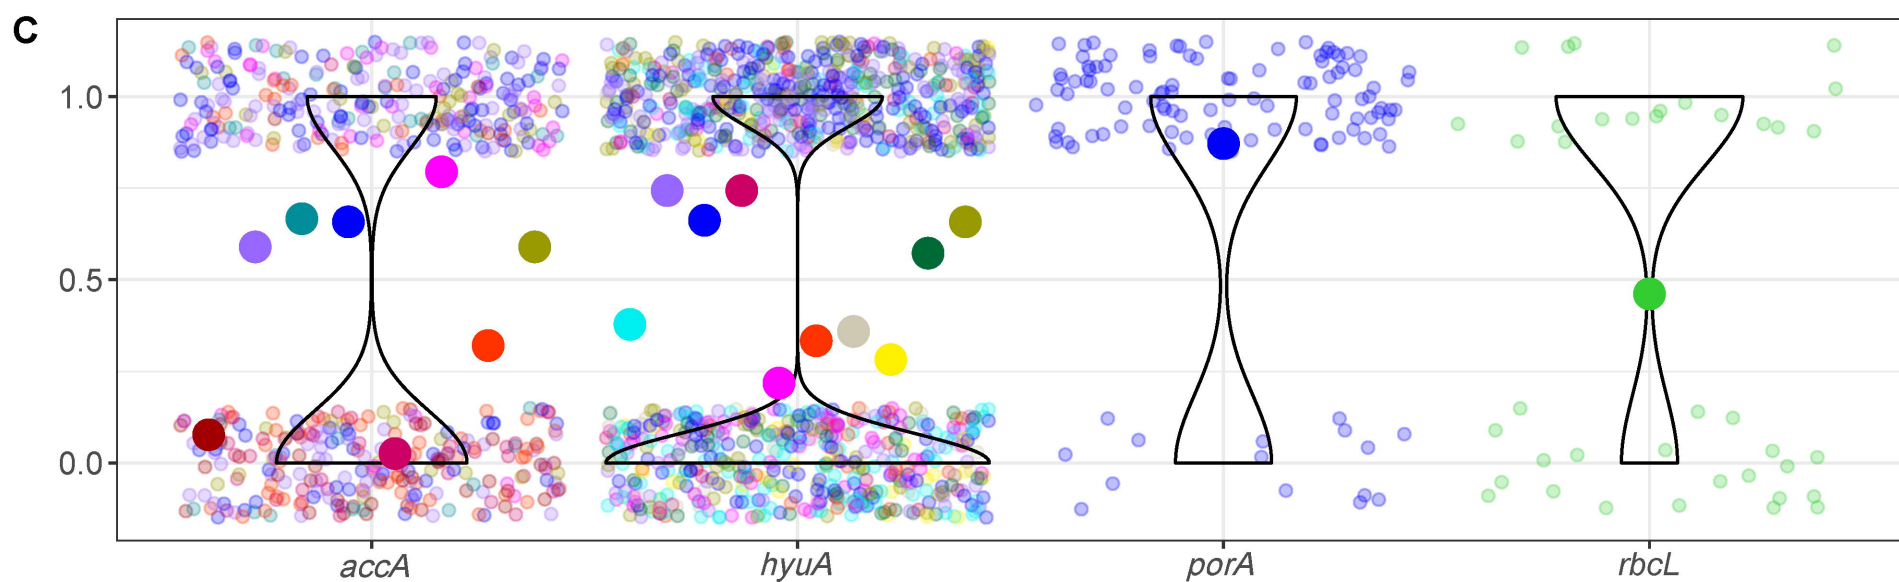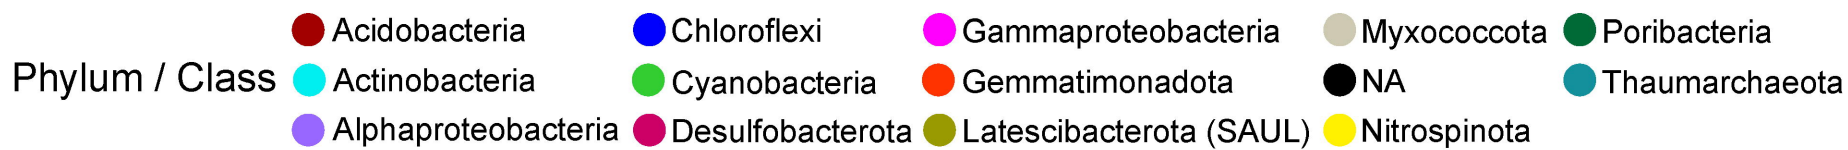

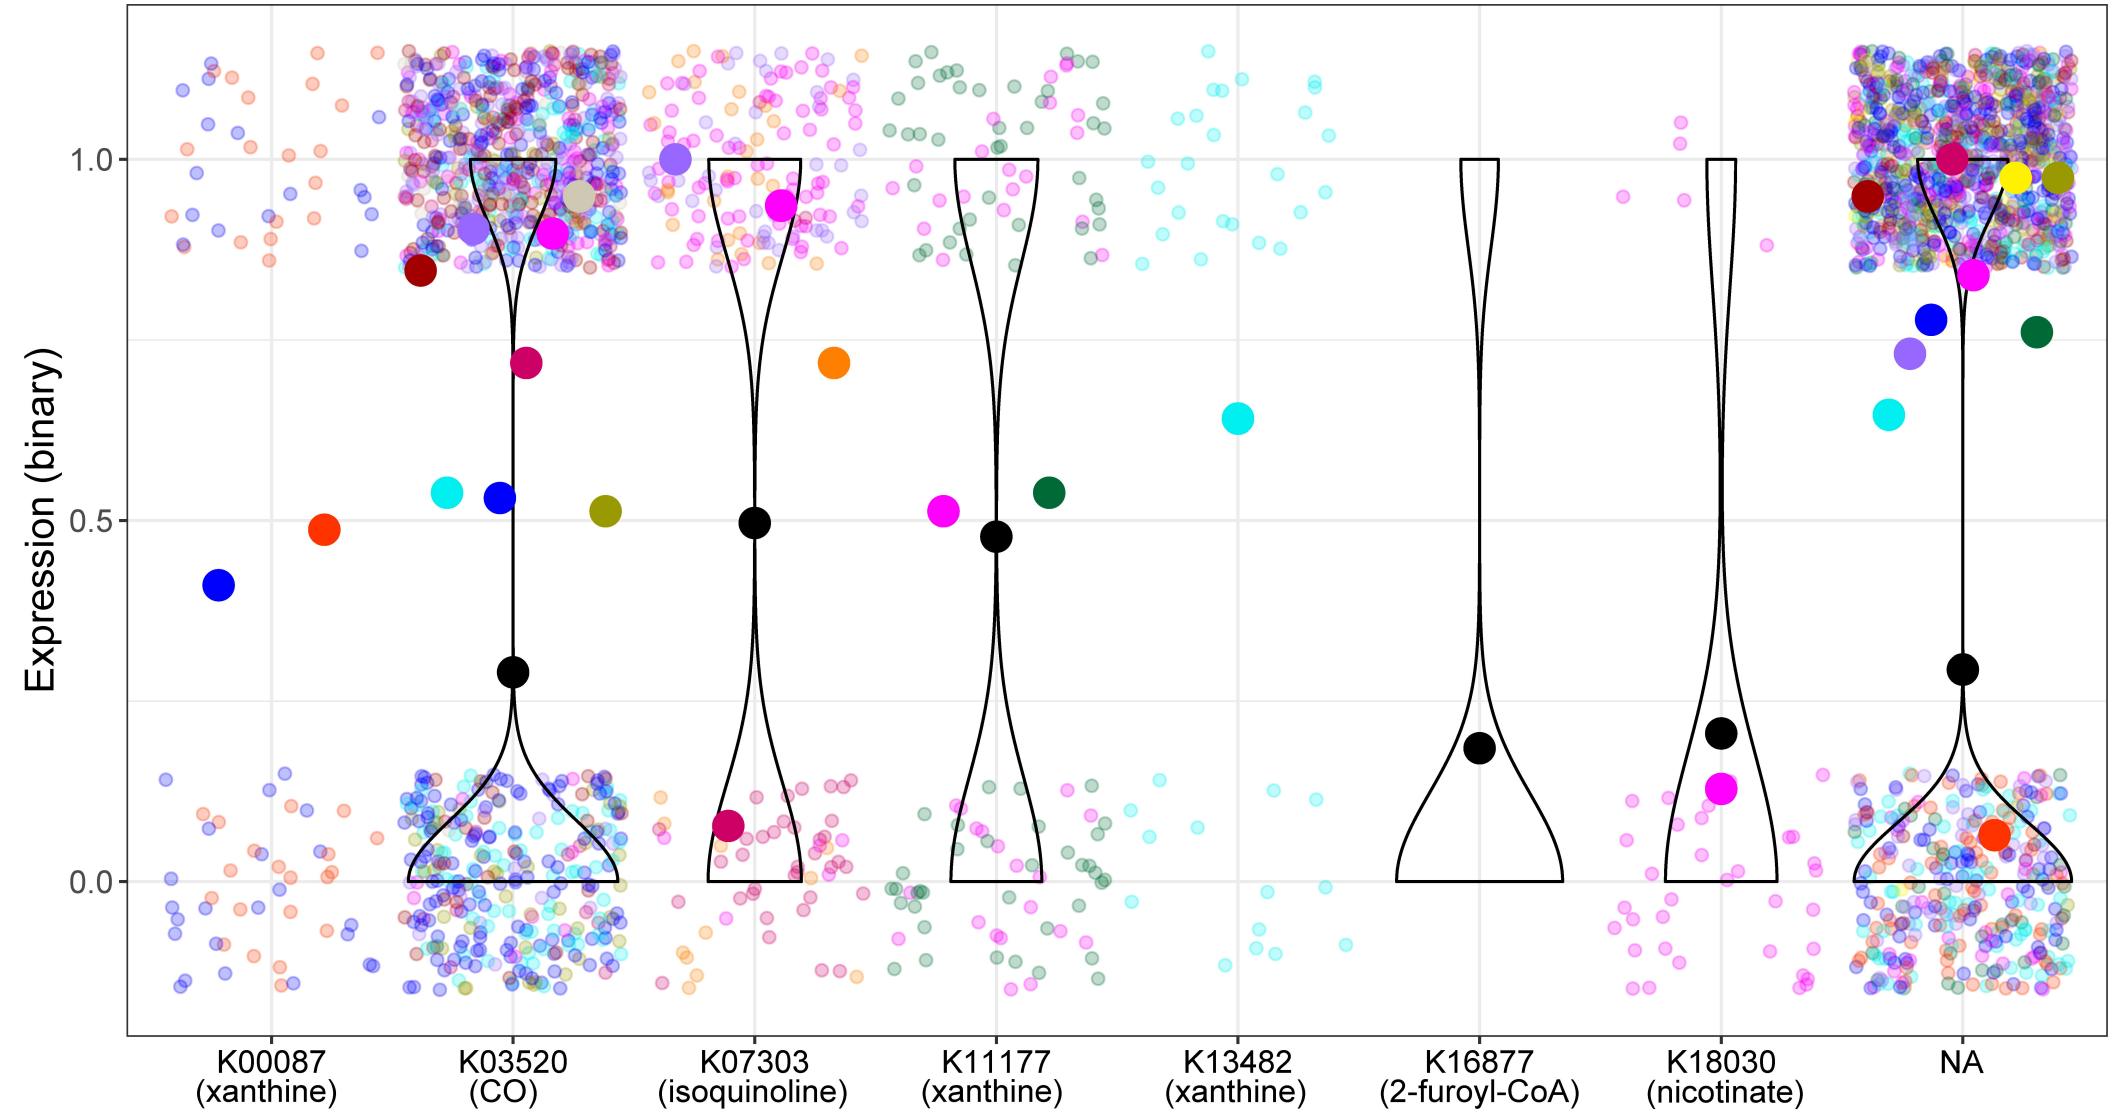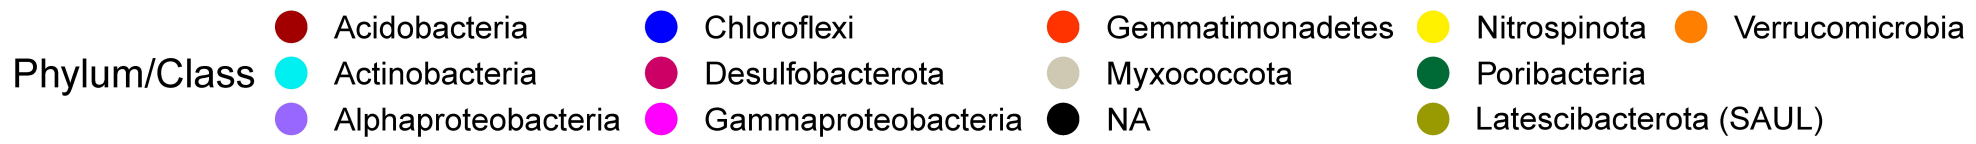

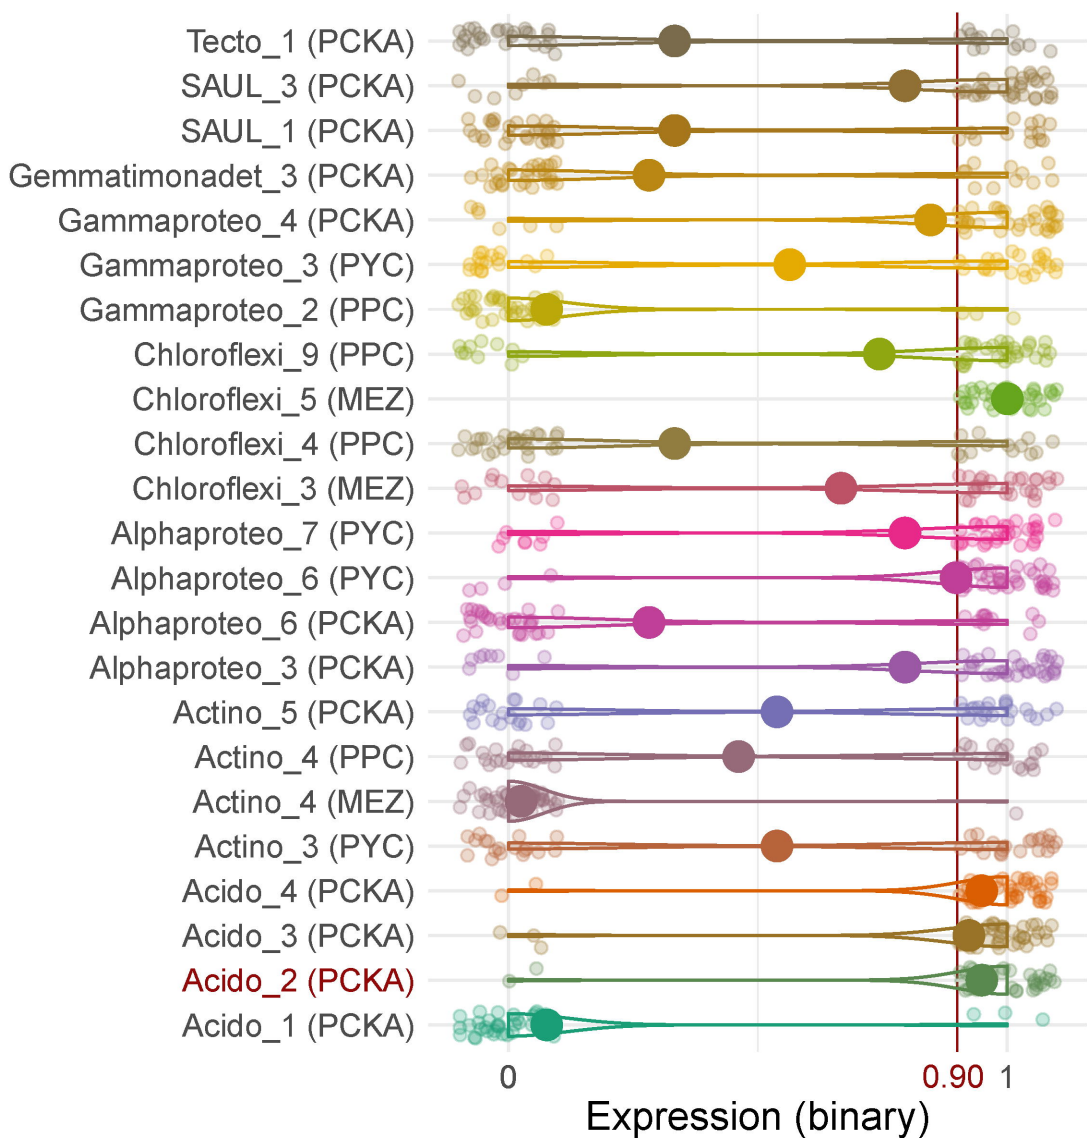



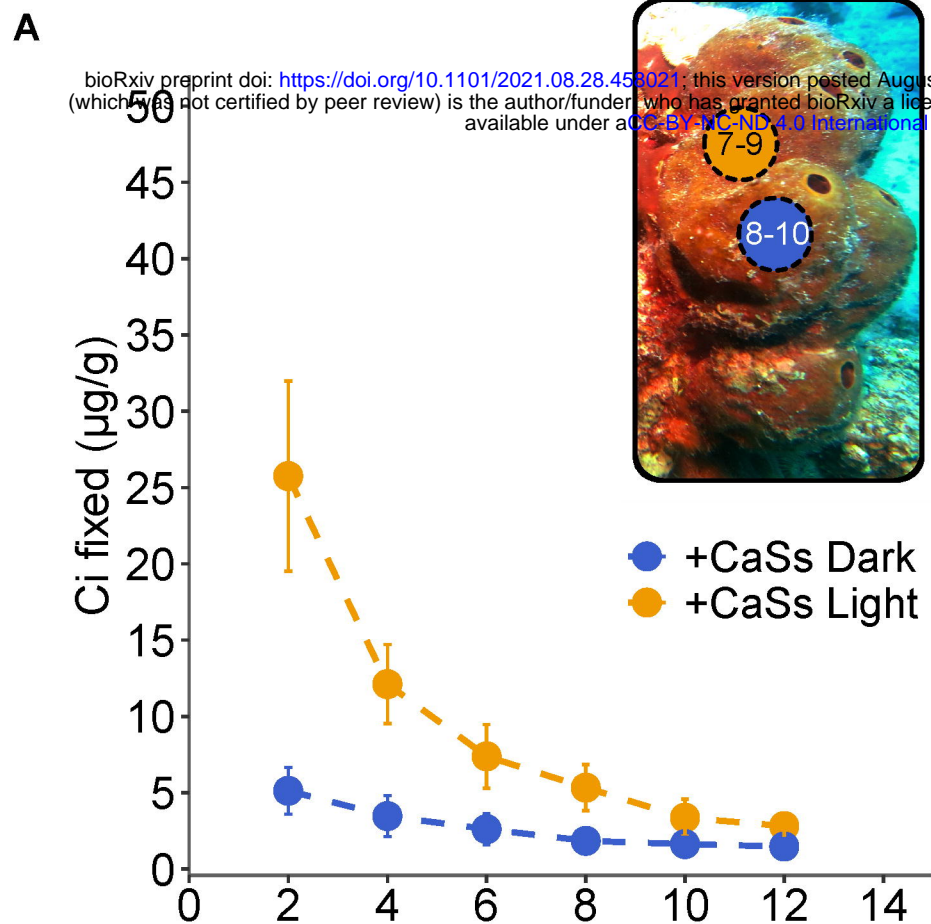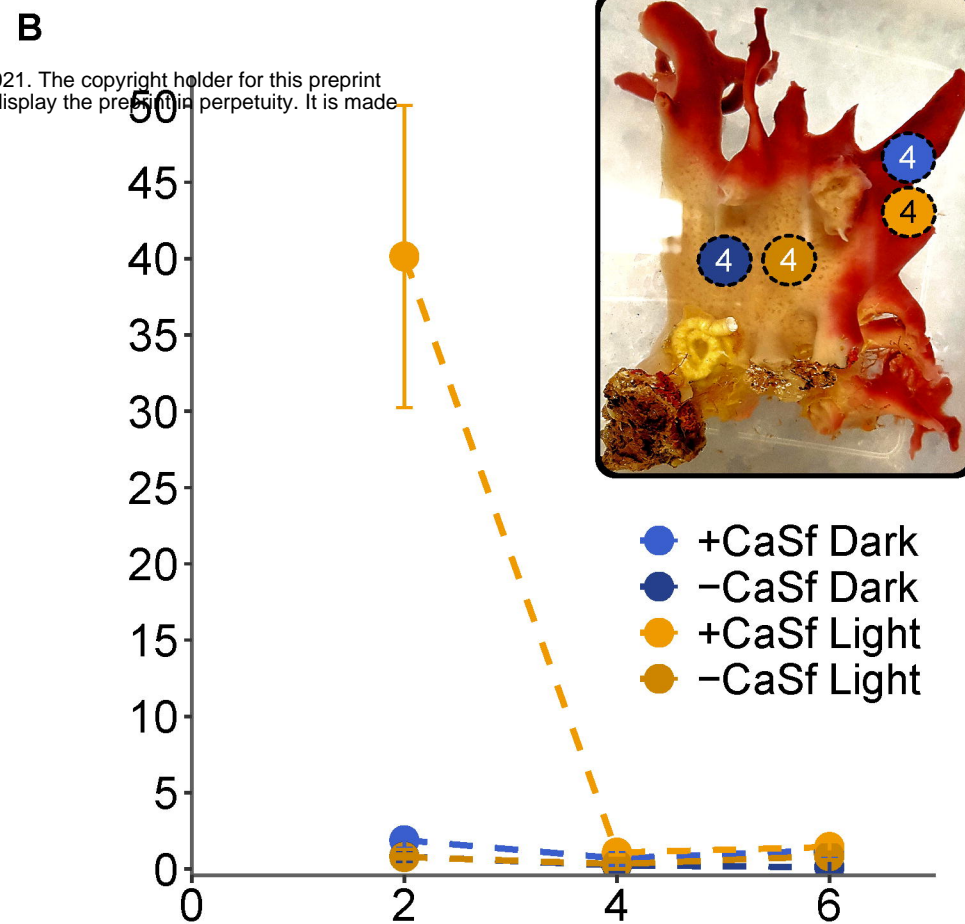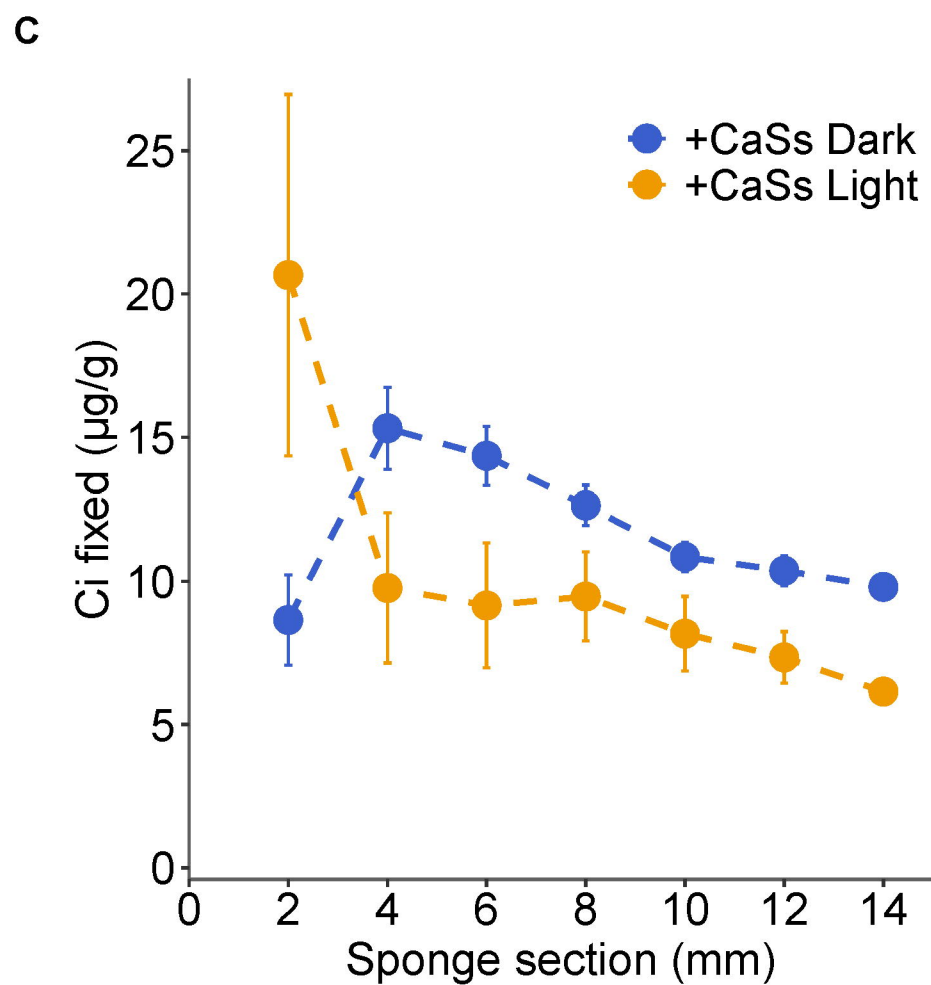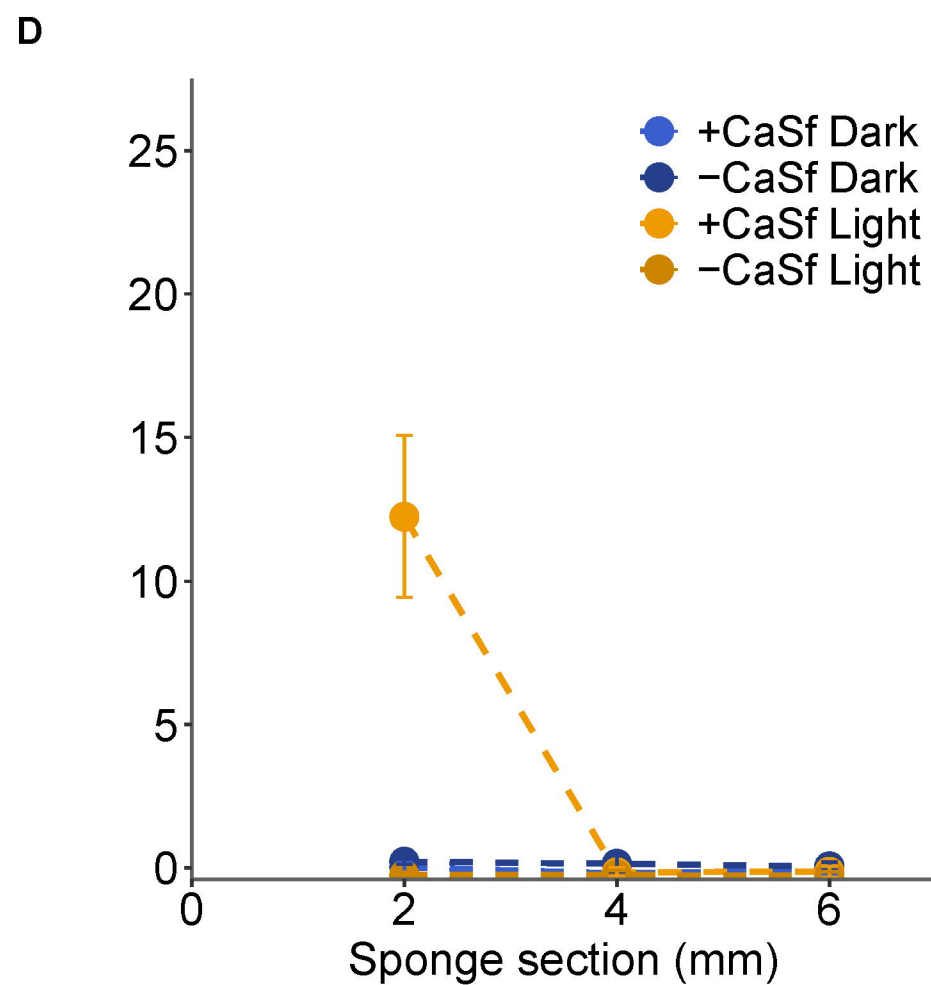

Source: https://www.biorxiv.org/content/biorxiv/early/2021/08/29/2021.08.28.458021.full.pdf
